# Supplementary material
Source: publisher figshare collection journal article supplement (https://gsapubs.figshare.com/articles/dataset/_/12529241)
Supplement: Supplementary file 1 [file 1]

| STATION | AREA (Fig. 2 domain) | UTM_X  | UTM_Y   | Category* | STRIKE | DIP  | DIR SLICK. LIN | TREND | PLUNGE | Comments                                                                                                                                                           |
|---------|----------------------|--------|---------|-----------|--------|------|----------------|-------|--------|--------------------------------------------------------------------------------------------------------------------------------------------------------------------|
| 3-224   | Mammon Mine (A)      | 764823 | 3783119 | 1         | 86     | 17   | S              |       |        | sharp, planar contact at base of resistant hematite+carbonate mineralized zone (probably principal slip plane)                                                     |
| 3-225   | Mammon Mine (A)      | 764839 | 3783122 | 4         | 116    | 24   | SW             | 262   | 14     | ≤2 m above principal slip plane (p.s.p.); subtle grooves                                                                                                           |
| 3-226   | Mammon Mine (A)      | 764909 | 3783271 | 1         | 63     | 26   | SE             | 227   | 8      | subtle grooves trend = 227 ± 5°                                                                                                                                    |
| 3-227   | Mammon Mine (A)      | 765000 | 3783207 | 2         | 95     | 16   | S              | 234   | 10.5   | excavated exposure; continuous, planar surface ~1/3 m above p.s.p.                                                                                                 |
| 3-228   | Mammon Mine (A)      | 765041 | 3783210 | 1         | 45     | 18   | SE             |       |        | road cut exposure                                                                                                                                                  |
| 3-124   | W Pride Mine (B)     | 771287 | 3782627 | 1         | 172    | 12   | W              | 218   | 9      | top of ~1 m thick ultracataclasite ledge                                                                                                                           |
| 3-124   | W Pride Mine (B)     |        |         | 1         |        |      |                | 202   | 6      |                                                                                                                                                                    |
| 3-125   | W Pride Mine (B)     | 771284 | 3782764 | 1         | 207    | 12   | NW             | 211   | 1      | top of exposed ultracatclasite                                                                                                                                     |
| 3-126   | W Pride Mine (B)     | 771268 | 3782729 | 1         | 180    | 12   | W              |       |        | excavated exposure; S-C gouge fabric and R shear suggest top-NE slip                                                                                               |
| 3-127   | W Pride Mine (B)     | 771336 | 3782334 | 3         | 169    | 15   | W              |       |        | detachment splits into two strands here w/ mylonitic carbonate in middle plate                                                                                     |
| 3-127   | W Pride Mine (B)     |        |         | 3         | 205    | 10   | NW             | 221   | 3      | slip surfaces here are ~1 m below upper detachment                                                                                                                 |
| 3-128   | W Pride Mine (B)     | 771343 | 3782159 | 1         | 162    | 20.5 | W              |       |        | lower brittle detachment above ~0.5-1 m thick ultracataclasite zone; possible slick set oriented 262, 15 (too subtle to confirm)                                   |
| 3-129   | W Pride Mine (B)     | 771360 | 3782133 | 1         | 176    | 22   | W              |       |        | lower detachment                                                                                                                                                   |
| 3-130   | W Pride Mine (B)     | 771544 | 3781937 | 1         | 170    | 40   | W              |       |        | lower detachment; S-C fabric in carbonate mylonite middle plate indicates apparent top-NE shear                                                                    |
| 3-131   | W Pride Mine (B)     | 771498 | 3781977 | 1         | 160    | 38   | SW             |       |        | lower detachment                                                                                                                                                   |
| 3-133   | W Pride Mine (B)     | 771518 | 3782046 | 1         | 259    | 37.5 | N              |       |        | lower detachment (? less alteration & brecciation here)                                                                                                            |
| 3-212   | Pride Mine (B)       | 773275 | 3782253 | 1         | 208    | 28   | W              |       |        |                                                                                                                                                                    |
| 3-213   | Pride Mine (B)       | 773458 | 3782322 | 1         | 201    | 16   | W              |       |        |                                                                                                                                                                    |
| 3-213   | Pride Mine (B)       |        |         | 1         | 214    | 8    | NW             | 227   | 2.5    | ≤10 cm below p.s.p.; a few R shears suggest top-NE slip                                                                                                            |
| 3-215   | Pride Mine (B)       | 773226 | 3782542 | 1         | 213    | 33   | NW             |       |        | main detachment?                                                                                                                                                   |
| 3-216   | Pride Mine (B)       | 773439 | 3782800 | 1         | 210    | 25   | NW             | 253   | 17.5   |                                                                                                                                                                    |
| 3-216   | Pride Mine (B)       |        |         | 1         |        |      |                | 222   | 5.5    |                                                                                                                                                                    |
| 3-216   | Pride Mine (B)       |        |         | 1         |        |      |                | 247   | 15.5   | slick set trending 247-253 is better preserved than 222                                                                                                            |
| 3-217   | Pride Mine (B)       |        |         | 1         | 215    | 25   | NW             | 232   | 8      | ~0.3 m thick ultracataclasite ledge                                                                                                                                |
| 3-217   | Pride Mine (B)       |        |         | 1         |        |      |                | 28    | 3.5    | subtle slicks                                                                                                                                                      |
| 3-217   | Pride Mine (B)       |        |         | 1         |        |      |                | 21    | 9      |                                                                                                                                                                    |
| 3-217   | Pride Mine (B)       | 773460 | 3782809 | 1         |        |      |                | 8     | 12     | slick set best preserved on <1 mm thick mineralized coating on p.s.p.                                                                                              |
| 3-218   | Pride Mine (B)       | 773374 | 3782978 | 1         | 98     | 28   | S              |       |        | p.s.p.?                                                                                                                                                            |
| 3-137   | Mineral Wash (C)     | 224357 | 3788294 | 1         | 271    | 20   | N              | 359   | 20     | top of exposed ultracataclasite ledge                                                                                                                              |
| 3-137   | Mineral Wash (C)     |        |         | 2         | 297    | 26   | N              | 55    | 24     | ~15 cm below p.s.p.; another possible slick set trending ~65                                                                                                       |
| 3-137   | Mineral Wash (C)     |        |         | 2         | 256    | 19   | N              | 314   | 17.5   | ~15 cm below p.s.p.                                                                                                                                                |
| 3-137   | Mineral Wash (C)     |        |         | 2         | 282    | 20   | N              |       |        | possible NW-trending slicks                                                                                                                                        |
| 3-140   | Mineral Wash (C)     | 775731 | 3789324 | 1         | 232    | 6    | NW             | 43    | 0.8    | ultracataclasite ledge ~0.5-0.75 m thick                                                                                                                           |
| 3-141   | Mineral Wash (C)     | 775755 | 3789319 | 1         | 207    | 10   | NW             |       |        | possible slicks trending ~220-230; S-C fabric in oriented thin section of u.catacl. indicates top-NE slip; NE-trending undulation in surface that merges w/ p.s.p. |
| 3-144   | Mineral Wash (C)     | 775785 | 3789321 | 1         | 232    | 16   | NW             | 303   | 15.5   | surface at top of ultracataclasite; subtle slicks                                                                                                                  |
| 3-144   | Mineral Wash (C)     |        |         | 1         |        |      |                | 312   | 16     | R shear suggests reverse (top-SE) slip                                                                                                                             |
| 3-145   | Mineral Wash (C)     | 776015 | 3789458 | 1         | 229    | 27   | NW             |       |        | surface at top of ultracataclasite                                                                                                                                 |
| 3-145   | Mineral Wash (C)     |        |         | 1         | 217    | 30   | NW             | 317   | 30     | ~2 cm below top of ultracataclasite                                                                                                                                |
| 3-145   | Mineral Wash (C)     |        |         | 1         |        |      |                | 234   | 9.5    |                                                                                                                                                                    |
| 3-146   | Mineral Wash (C)     | 776037 | 3789500 | 1         | 227    | 8    | NW             | 331   | 7.5    | top of exposed ultracatclasite                                                                                                                                     |
| 3-148   | Mineral Wash (C)     | 776070 | 3789658 | 1         | 238    | 6    | NW             |       |        |                                                                                                                                                                    |
| 3-149   | Mineral Wash (C)     | 776129 | 3789707 | 1         | 213    | 6    | NW             |       |        | possible slicks trending ~290-295                                                                                                                                  |
| 3-150   | Mineral Wash (C)     | 776162 | 3789722 | 1         | 218    | 28   | NW             |       |        | possible slicks trending ~292                                                                                                                                      |
| 3-150   | Mineral Wash (C)     |        |         | 1         | 224    | 21   | NW             |       |        |                                                                                                                                                                    |
| 3-157   | Mineral Wash (C)     | 775980 | 3790500 | 2         | 340    | 4    | NE             | 145   | 2      | ~0.2-0.5 m below p.s.p.                                                                                                                                            |
| 3-158   | Mineral Wash (C)     | 775965 | 3790487 | 2         | 303.5  | 4    | NE             | 350   | 4      | polished ultracataclasite surface 3-15 cm below p.s.p.; subtle slicks                                                                                              |
| 3-159   | Mineral Wash (C)     | 775964 | 3790475 | 2         |        |      |                | 331.5 | 2      | curviplanar polished surface ~5-20 cm below p.s.p.                                                                                                                 |
| 3-160   | Mineral Wash (C)     | 775790 | 3790432 | 2         | 55     | 2    | SE             | 130   | 2      | curviplanar polished surface ~5-20 cm below p.s.p.                                                                                                                 |
| 3-160   | Mineral Wash (C)     |        |         | 1         | 208    | 8    | NW             |       |        | polished base of coherent upper plate                                                                                                                              |
| 3-162   | Mineral Wash (C)     | 775590 | 3790802 | 1         | 222    | 4    | NW             | 40    | 0.5    |                                                                                                                                                                    |
| 3-162   | Mineral Wash (C)     |        |         | 5         | 11     | 16   | E              | 49    | 10     | curviplanar surface 0.4 to 0.5 m below p.s.p.; discordant to very gently NW-dipping p.s.p.                                                                         |
| 3-162   | Mineral Wash (C)     |        |         | 5         |        |      |                | 64    | 8      |                                                                                                                                                                    |
| 3-162   | Mineral Wash (C)     |        |         | 5         |        |      |                | 80    | 8      |                                                                                                                                                                    |
| 3-199   | Squaw Peak (D)       | 228089 | 3784550 | 1         | 112    | 4    | S              |       |        | ultracataclasite ledge ~0.75-1 m thick; strike=112±20°                                                                                                             |

|       |                            |        |         |    |     |      |    |       |      |                                                                                                                                           |
|-------|----------------------------|--------|---------|----|-----|------|----|-------|------|-------------------------------------------------------------------------------------------------------------------------------------------|
| 3-200 | Squaw Peak (D)             | 228376 | 3784342 | 1  | 195 | 8    | W  | 221   | 3    | polished plane near top of ultracataclasite ledge                                                                                         |
| 3-201 | Squaw Peak (D)             | 228334 | 3784246 | 1  | 242 | 3.5  | NW | 30    | 2    | top of ~15 cm thick ultracataclasite ledge                                                                                                |
| 3-202 | Squaw Peak (D)             | 228316 | 3784222 | 1  |     |      |    | 61    | 0.1  |                                                                                                                                           |
| 3-202 | Squaw Peak (D)             |        |         | 1  |     |      |    | 48    | 1    |                                                                                                                                           |
| 3-202 | Squaw Peak (D)             |        |         | 1  |     |      |    | 37    | 1.5  |                                                                                                                                           |
| 3-203 | Squaw Peak (D)             | 228769 | 3783562 | 1  | 273 | 8    | N  |       |      | top of ultracataclasite ledge                                                                                                             |
| 3-204 | Squaw Peak (D)             | 228127 | 3783635 | 1  | 320 | 5    | NE | 39    | 5    | slicks on surface 5 cm below p.s.p.; calcite veinlets w/ apparent NE-dip in oriented thin section of ultracataclasite suggest top-NE slip |
| 3-205 | Squaw Peak (D)             | 227922 | 3783665 | 2  |     |      |    | 197   | 1    | curvilinear surface ≤0.3 m below p.s.p.                                                                                                   |
| 3-206 | Squaw Peak (D)             | 227670 | 3784062 | 1  | 359 | 11   | E  |       |      |                                                                                                                                           |
| 3-208 | Squaw Peak (D)             | 227693 | 3784127 | 1  | 31  | 7    | SE |       |      | very subtle slicks trending ~40-50°                                                                                                       |
| 3-209 | Squaw Peak (D)             | 227700 | 3784149 | 2  |     |      |    | 218   | 5    | curvilinear surface at top of ultracataclasite                                                                                            |
| 3-210 | Squaw Peak (D)             | 227820 | 3784387 | 1  | 50  | 7    | SE |       |      |                                                                                                                                           |
| 3-211 | Squaw Peak (D)             | 228014 | 3784561 | 2  | 56  | 7    | SE | 208   | 4    | very smooth, planar surface ~0.5 m below p.s.p.                                                                                           |
| 3-211 | Squaw Peak (D)             |        |         | 2  |     |      |    | 203   | 4.5  | one groove curves from 200 to 203 in NE direction                                                                                         |
| 3-119 | SW Clara Peak antiform (E) | 233798 | 3777129 | 1  | 355 | 26   | E  | 132.1 | 18.4 | top of <1 m thick ultracataclasite ledge                                                                                                  |
| 3-119 | SW Clara Peak antiform (E) |        |         | 1  |     |      |    | 33    | 17   | subtle slicks                                                                                                                             |
| 3-119 | SW Clara Peak antiform (E) |        |         | 1  | 3   | 20   | E  | 132   | 15.9 | subtle slicks on surface ~2 cm below p.s.p.                                                                                               |
| 3-119 | SW Clara Peak antiform (E) |        |         | 1  | 346 | 22   | E  |       |      |                                                                                                                                           |
| 3-119 | SW Clara Peak antiform (E) |        |         | 4+ | 343 | 22   | E  | 59    | 17   | polished ultracataclasite ~3 m below p.s.p.; subtle slicks                                                                                |
| 3-163 | Planet Wash (F)            | 227114 | 3789088 | 1  | 180 | 12   | W  |       |      | uppermost exposed ultracataclasite surface                                                                                                |
| 3-164 | Planet Wash (F)            | 227123 | 3789113 | 1  | 215 | 18   | NW | 308   | 18   | exposed ultracataclasite; irregular surface                                                                                               |
| 3-165 | Planet Wash (F)            | 228247 | 3790661 | 2  | 216 | 30   | NW |       |      | approximate orientation of ~1 m thick ultracataclasite ledge                                                                              |
| 3-168 | Planet Wash (F)            | 228363 | 3790808 | 1  | 207 | 15   | NW | 217   | 2.5  | polished surface ~2 cm below uppermost exposed ultracataclasite                                                                           |
| 3-169 | Planet Wash (F)            | 228353 | 3790816 | 1  | 201 | 16.5 | NW | 359   | 6.5  | ~6 cm below top of exposed ultracataclasite                                                                                               |
| 3-169 | Planet Wash (F)            |        |         | 1  |     |      |    | 218   | 5    | in one area slick set trending 218 appears to truncate set trending 359, which is not quite as well-preserved                             |
| 3-170 | Planet Wash (F)            | 226855 | 3793068 | 5  | 61  | 17   | SE | 224   | 5    | gouge zone fault <2 m above p.s.p.; discordant to p.s.p.                                                                                  |
| 3-171 | Planet Wash (F)            | 226853 | 3793101 | 1  | 173 | 12   | W  |       |      | 3-170 to 3-176 are along series of excavated exposures; 173, 12 W is surface <10 cm above p.s.p.                                          |
| 3-171 | Planet Wash (F)            |        |         | 3  | 216 | 20   | NW |       |      | slip surface ~1 m above p.s.p.                                                                                                            |
| 3-171 | Planet Wash (F)            |        |         | 4  | 211 | 19   | NW | 222   | 3.5  | ~1.5 m above p.s.p.                                                                                                                       |
| 3-171 | Planet Wash (F)            |        |         | 4  |     |      |    | 346   | 13.5 | slick set trending 346 is not quite as pronounced as set trending 222                                                                     |
| 3-172 | Planet Wash (F)            | 226843 | 3793181 | 2  | 194 | 17   | W  | 207   | 5    | curvilinear surface <0.5 m above p.s.p.                                                                                                   |
| 3-172 | Planet Wash (F)            |        |         | 2  |     |      |    | 201   | 2.5  | in one area groove trending 201 appears to cut truncate slicks trending 226                                                               |
| 3-172 | Planet Wash (F)            |        |         | 2  |     |      |    | 226   | 9.3  |                                                                                                                                           |
| 3-172 | Planet Wash (F)            |        |         | 2  |     |      |    | 360   | 4    | clear slicks exposed only on ~1 cm <sup>2</sup> area; overprinted by slick set trending 207°                                              |
| 3-172 | Planet Wash (F)            |        |         | 2  | 269 | 14   | N  | 44    | 10   | polished surface ~0.4 m below p.s.p.                                                                                                      |
| 3-172 | Planet Wash (F)            |        |         | 2  |     |      |    | 66    | 6    |                                                                                                                                           |
| 3-172 | Planet Wash (F)            | 226843 | 3793181 | 5  | 79  | 18   | S  | 188   | 17   | curvilinear surface <0.5 m above p.s.p.; discordant to p.s.p.; N-trending slicks noted on ~1 cm <sup>2</sup> part of surface              |
| 3-172 | Planet Wash (F)            |        |         | 5  |     |      |    | 207   | 14.5 | apparent truncation of slicks trending 226 by groove trending 201                                                                         |
| 3-172 | Planet Wash (F)            |        |         | 5  |     |      |    | 220   | 12   | slick set trending 188 is better preserved than sets trending 207 & 220                                                                   |
| 3-173 | Planet Wash (F)            | 226840 | 3793198 | 5  | 153 | 15   | SW | 197   | 10.5 | ~1 m above p.s.p.; discordant to p.s.p.                                                                                                   |
| 3-174 | Planet Wash (F)            | 226823 | 3793216 | 2  | 210 | 15   | NW | 218.5 | 2    | slip surface ~15-20 cm above p.s.p.                                                                                                       |
| 3-175 | Planet Wash (F)            | 226771 | 3793238 | 1  | 20  | 2    | E  | 20.5  | 0.1  | slick set trending 20 is most prominent set here                                                                                          |
| 3-175 | Planet Wash (F)            |        |         | 1  |     |      |    | 138   | 1.5  |                                                                                                                                           |
| 3-175 | Planet Wash (F)            |        |         | 1  |     |      |    | 170   | 1    |                                                                                                                                           |
| 3-176 | Planet Wash (F)            | 226770 | 3793227 | 1  |     |      |    | 10    | 1    | polished surface <10 cm below p.s.p.; subtle ENE-trending slick set?                                                                      |
| 3-176 | Planet Wash (F)            |        |         | 2  | 80  | 14   | S  | 134   | 12   | p.s.p. is subhorizontal at 3-175 to 3-176 area                                                                                            |
| 3-176 | Planet Wash (F)            |        |         | 5  | 206 | 19   | NW | 335   | 15   | ~0.3-0.5 m below p.s.p.                                                                                                                   |
| 4-539 | Planet Wash (F)            | 228011 | 3792522 | 1  | 160 | 15   | W  |       |      | approximate orientation of p.s.p.                                                                                                         |
| 4-540 | Planet Wash (F)            | 228011 | 3792421 | 1  | 120 | 10   | SW | 226   | 9.8  |                                                                                                                                           |
| 4-540 | Planet Wash (F)            |        |         | 1  |     |      |    | 208   | 10   |                                                                                                                                           |
| 4-542 | Planet Wash (F)            | 228792 | 3791843 | 1  | 226 | 23   | NW |       |      | approximate orientation of p.s.p.                                                                                                         |
| 4-543 | Planet Wash (F)            | 228812 | 3791599 | 1  | 208 | 20   | NW | 227   | 7    |                                                                                                                                           |
| 4-544 | Planet Wash (F)            | 228659 | 3791445 | 1  | 214 | 25   | NW |       |      | approximate orientation of p.s.p.                                                                                                         |
| 4-547 | Planet Wash (F)            | 226018 | 3793465 | 1  | 120 | 7    | SW |       |      | approximate orientation of p.s.p.                                                                                                         |
| 4-548 | Planet Wash (F)            | 225815 | 3793606 | 1  | 175 | 9    | W  |       |      |                                                                                                                                           |
| 4-549 | Planet Wash (F)            | 225965 | 3793886 | 1  | 200 | 18   | W  |       |      | approximate orientation of p.s.p.                                                                                                         |

|         |                              |        |         |   |      |      |    |      |      |                                                                                                                                     |
|---------|------------------------------|--------|---------|---|------|------|----|------|------|-------------------------------------------------------------------------------------------------------------------------------------|
| 1-59    | Copper Penny (G)             | 232331 | 3784033 | 1 | 42   | 21   | SE | 221  | 1    | excavated exposure                                                                                                                  |
| 1-59    | Copper Penny (G)             |        |         | 1 |      |      |    | 138  | 20   | subtle slicks exposed only in one small area                                                                                        |
| 1-59    | Copper Penny (G)             |        |         | 1 |      |      |    | 214  | 6    |                                                                                                                                     |
| 1-61    | Copper Penny (G)             | 232407 | 3784094 | 1 | 14   | 20   | E  |      |      | strike $\pm 10^\circ$                                                                                                               |
| 1-96    | Copper Penny (G)             | 232860 | 3784480 | 1 | 37   | 39.5 | SE | 214  | 3    | slick set trending 214 is more pronounced than set trending 171                                                                     |
| 1-96    | Copper Penny (G)             |        |         | 1 |      |      |    | 171  | 30   |                                                                                                                                     |
| 1-96    | Copper Penny (G)             |        |         | 1 | 43   | 37   | SE | 193  | 21   | subtle slicks                                                                                                                       |
| 1-98    | Copper Penny (G)             | 232909 | 3784545 | 1 | 28   | 45   | SE | 31.5 | 3.5  | excavated exposure; oriented thin section of cataclasite along p.s.p.                                                               |
| 2-36    | Copper Penny (G)             | 233390 | 3784611 | 1 | 85   | 5    | S  | 219  | 3    | undulating detachment at entrance to adit                                                                                           |
| 2-36    | Copper Penny (G)             |        |         | 1 | 60   | 20   | SE | 224  | 6    | apparent S-C fabrics in gouge zone exposed in adit suggest top-NW (reverse) slip; R shears suggest top-NE slip                      |
| 2-36    | Copper Penny (G)             |        |         | 1 | 42   | 15   | SE |      |      |                                                                                                                                     |
| 2-37    | Copper Penny (G)             | 233207 | 3784472 | 1 | 50   | 14   | SE | 218  | 3    |                                                                                                                                     |
| 2-38    | Copper Penny (G)             | 233244 | 3784482 | 1 | 54   | 14   | SE | 216  | 4.5  |                                                                                                                                     |
| 3-188   | Copper Penny (G)             | 234187 | 3785430 | 1 | 165  | 3    | W  |      |      |                                                                                                                                     |
| 3-188   | Copper Penny (G)             |        |         | 2 |      |      |    | 291  | 2    | slicks on subhorizontal surface 20-25 cm below p.s.p.                                                                               |
| 3-189   | Copper Penny (G)             | 234199 | 3785478 | 1 | 95   | 4    | S  |      |      |                                                                                                                                     |
| 3-190   | Copper Penny (G)             | 234169 | 3785515 | 1 | 90   | 5    | S  | 216  | 4    |                                                                                                                                     |
| 3-190   | Copper Penny (G)             |        |         | 1 |      |      |    | 206  | 5    |                                                                                                                                     |
| 3-190   | Copper Penny (G)             |        |         | 1 |      |      |    | 195  | 5    |                                                                                                                                     |
| 3-190.5 | Copper Penny (G)             | 234034 | 3785177 | 1 | 55   | 20   | SE | 216  | 6.5  | possible slicks trending $\sim 185^\circ$                                                                                           |
| 3-190.5 | Copper Penny (G)             |        |         | 1 |      |      |    | 212  | 8    |                                                                                                                                     |
| 3-191   | Copper Penny (G)             | 233338 | 3784568 | 1 | 7    | 9    | E  | 36   | 5    | undulating p.s.p.                                                                                                                   |
| 6-168   | Copper Penny (G)             | 232484 | 3784135 | 1 | 58   | 27   | SE | 208  | 10   |                                                                                                                                     |
| 6-168   | Copper Penny (G)             | 232484 | 3784135 | 1 |      |      |    | 225  | 6    |                                                                                                                                     |
| 6-168   | Copper Penny (G)             | 232484 | 3784135 | 1 | 57   | 22   | SE | 204  | 6    | $\sim 4$ m from 58, 27 SE attitude                                                                                                  |
| 6-169   | Copper Penny (G)             | 233324 | 3784537 | 1 | 26   | 16   | SE | 40   | 7    | avg. attitude of undulatory p.s.p.                                                                                                  |
| 6-169+  | Copper Penny (G)             | 233257 | 3784490 | 1 | 42   | 18   | SE |      |      | near 2-38, dip is $\pm 7$                                                                                                           |
| 1-63    | W Swansea (H)                | 235621 | 3783860 | 1 | 223  | 49   | NW |      |      | excavated exposure; apparent S-C fabrics suggest reverse slip (top-SE)                                                              |
| 3-192   | W Swansea (H)                | 234547 | 3782979 | 1 | 212  | 47   | NW |      |      | excavated exposure                                                                                                                  |
| 3-193   | W Swansea (H)                | 235128 | 3783620 | 1 | 205  | 42   | NW |      |      |                                                                                                                                     |
| 3-194   | W Swansea (H)                | 235069 | 3783534 | 1 | 233  | 30   | NW |      |      | excavated exposure                                                                                                                  |
| 3-194   | W Swansea (H)                |        |         | 2 | 215  | 22   | NW | 299  | 21   | <0.5 m below p.s.p.; microfaults in ultracataclasite; sample cut // to slicks indicate top-SE (reverse) slip                        |
| 3-196   | SW Swansea (H)               | 233922 | 3781794 | 2 | 182  | 7    | W  |      |      | smooth, planar surface <20 cm below p.s.p.                                                                                          |
| 3-196   | SW Swansea (H)               |        |         | 2 | 198  | 7    | W  | 235  | 4.5  | curvilinear, just above 182, 7 W surface                                                                                            |
| 3-196   | SW Swansea (H)               |        |         | 2 | 157  | 7    | SW | 313  | 3.5  | strike is approximate (cataclasite is locally magnetic here)                                                                        |
| 3-197   | SW Swansea (H)               | 233743 | 3781411 | 2 | 228  | 16   | NW | 305  | 15.5 | ultracataclasite along wash                                                                                                         |
| 3-198   | SW Swansea (H)               | 233761 | 3781438 | 1 | 215  | 12   | NW | 217  | 0.5  | subtle slicks                                                                                                                       |
| 3-198   | SW Swansea (H)               |        |         | 2 | 203  | 8    | NW | 308  | 7.5  | $\sim 15$ cm below p.s.p.                                                                                                           |
| 4-371   | W Swansea (H)                | 235604 | 3783847 | 1 | 220  | 50   | NW | 223  | 3.5  | steepest measured dip of detachment in core complex; subtle slicks noted with hand lense on oriented sample of p.s.p.               |
| 3-180   | N Copper Penny (I)           | 232842 | 3788161 | 1 | 224  | 20   | NW |      |      | orientation of ultracataclasite ledge                                                                                               |
| 3-181   | N Copper Penny (I)           | 232996 | 3788245 | 1 | 236  | 30   | NW |      |      | orientation of ultracataclasite ledge; $\sim 0.4$ m thick                                                                           |
| 3-183   | N Copper Penny (I)           | 232929 | 3788345 | 1 | 250  | 28   | NW |      |      | orientation of ultracataclasite ledge                                                                                               |
| 3-117   | SW Lincoln Ranch synform (J) | 239861 | 3777936 | 1 | 254  | 10   | N  |      |      | top of exposed ultracataclasite (average of several attitudes)                                                                      |
| 2-72    | W Butler Valley (K)          | 244864 | 3770783 | 1 | 45.5 | 21   | SE | 148  | 20.5 | excavated exposure                                                                                                                  |
| 2-72    | W Butler Valley (K)          |        |         | 1 |      |      |    | 155  | 20   | Fe-oxide steps and apparent R shears in ultracataclasite thin section cut parallel to SSE-trending slicks suggests top-NW (reverse) |
| 2-72    | W Butler Valley (K)          |        |         | 1 |      |      |    | 164  | 18   |                                                                                                                                     |
| 2-72    | W Butler Valley (K)          |        |         | 1 |      |      |    | 170  | 17   |                                                                                                                                     |
| 2-72    | W Butler Valley (K)          |        |         | 1 |      |      |    | 176  | 16   |                                                                                                                                     |
| 2-72    | W Butler Valley (K)          |        |         | 1 | 45   | 21   | SE | 139  | 21   | most clear slick set; groove trending 139 curves to 149 in down-dip direction                                                       |
| 2-72    | W Butler Valley (K)          |        |         | 1 |      |      |    | 217  | 3    | most subtle slick set                                                                                                               |
| 2-72    | W Butler Valley (K)          |        |         | 1 |      |      |    | 191  | 12   | one groove appears to plow across subtle SW-plunging groove                                                                         |
| 2-73    | W Butler Valley (K)          | 244869 | 3770793 | 1 | 42   | 19   | SE | 150  | 18   |                                                                                                                                     |
| 2-73    | W Butler Valley (K)          |        |         | 1 |      |      |    | 140  | 18.5 |                                                                                                                                     |
| 2-74    | W Butler Valley (K)          | 244884 | 3770802 | 1 | 50   | 23   | SE | 209  | 9    | faint slicks                                                                                                                        |

|        |                     |        |         |    |       |     |    |       |      |                                                                                                   |
|--------|---------------------|--------|---------|----|-------|-----|----|-------|------|---------------------------------------------------------------------------------------------------|
| 2-74   | W Butler Valley (K) |        |         | 1  |       |     |    | 230   | 0    | faint slicks                                                                                      |
| 2-75   | W Butler Valley (K) | 244899 | 3770807 | 1  | 40    | 21  | SE | 202   | 7    | faint slicks                                                                                      |
| 12-126 | W Butler Valley (K) | 244835 | 3770724 | 1  | 13    | 17  | E  |       |      |                                                                                                   |
| 12-127 | W Butler Valley (K) | 244839 | 3770745 | 1  | 40.5  | 21  | SE |       |      |                                                                                                   |
| 4-161  | Swansea (L)         | 237749 | 3784096 | 1  | 240   | 45  | NW |       |      |                                                                                                   |
| 4-162  | Swansea (L)         | 237881 | 3784155 | 1  | 252   | 42  | N  | 36    | 27.5 |                                                                                                   |
| 4-162  | Swansea (L)         |        |         | 1  |       |     |    | 40    | 26   |                                                                                                   |
| 4-340  | E Swansea (L)       | 239535 | 3785156 | 1  | 227   | 26  | NW |       |      | excavated exposure                                                                                |
| 4-343  | E Swansea (L)       | 239619 | 3785251 | 2  | 230   | 33  | NW |       |      | approximate ultracataclasite ledge orientation                                                    |
| 4-343  | E Swansea (L)       |        |         | 2  |       |     |    | 231   | 0.1  | subtle slicks                                                                                     |
| 4-345  | E Swansea (L)       | 239759 | 3785382 | 1  | 223   | 32  | NW |       |      | top of exposed ultracataclasite                                                                   |
| 4-347  | E Swansea (L)       | 239815 | 3785441 | 1  | 218.5 | 40  | NW |       |      |                                                                                                   |
| 4-368  | Swansea (L)         | 236958 | 3783661 | 1  | 236   | 44  | NW |       |      |                                                                                                   |
| 4-250  | Clara Peak (M)      | 241282 | 3783620 | 1  | 201   | 4   | NW | 224   | 2    | shaft; ~0.3-0.4 m red-brown ultracataclasite (above gray-green cataclasite) at top of lower plate |
| 4-250  | Clara Peak (M)      |        |         | 1  |       |     |    | 229   | 2    |                                                                                                   |
| 4-250  | Clara Peak (M)      |        |         | 1  |       |     |    | 234.5 | 2.5  |                                                                                                   |
| 4-250  | Clara Peak (M)      |        |         | 1  |       |     |    | 219   | 2    |                                                                                                   |
| 4-258  | Clara Peak (M)      | 240733 | 3784055 | 1  | 79    | 2   | S  |       |      |                                                                                                   |
| 4-264  | Clara Peak (M)      | 240591 | 3783970 | 1  | 12    | 7   | E  |       |      | orientation of ultracataclasite ledge                                                             |
| 4-265  | Clara Peak (M)      | 240459 | 3783855 | 1  | 325   | 4   | NE |       |      |                                                                                                   |
| 4-266  | Clara Peak (M)      | 240468 | 3783838 | 1  | 315   | 5   | NE | 48    | 5    |                                                                                                   |
| 4-266  | Clara Peak (M)      |        |         | 1  |       |     |    | 30    | 5    |                                                                                                   |
| 6-131  | Clara Peak (M)      | 240484 | 3783752 | 5  | 237   | 18  | NW | 57    | 0    | ~0.8 m (?) below p.s.p; smooth, planar surface                                                    |
| 6-132  | Clara Peak (M)      | 240474 | 3783782 | 2  | 290   | 5   | N  | 49    | 4    | excavated exposure; ~20 cm above p.s.p.                                                           |
| 6-132  | Clara Peak (M)      | 240474 | 3783782 | 2  |       |     |    | 344   | 4.5  | unclear timing relationships between NE- and NNW-trending slicks                                  |
| 6-132  | Clara Peak (M)      | 240474 | 3783782 | 2  |       |     |    | 351   | 4.5  |                                                                                                   |
| 2-109  | Clara District (N)  | 240505 | 3782396 | 1  | 56.5  | 9.5 | SE | 212   | 4    | excavated exposure                                                                                |
| 2-109  | Clara District (N)  |        |         | 1  |       |     |    | 202   | 5    | less clear than 212 trending set                                                                  |
| 2-109  | Clara District (N)  |        |         | 1  |       |     |    | 191   | 6    | less clear than 212 trending set                                                                  |
| 2-109  | Clara District (N)  |        |         | 1  |       |     |    | 232   | 1    |                                                                                                   |
| 2-109  | Clara District (N)  |        |         | 1  | 77    | 10  | S  | 185   | 9.5  |                                                                                                   |
| 2-109  | Clara District (N)  |        |         | 1  | 91    | 6   | S  | 179   | 6    |                                                                                                   |
| 2-110  | Clara District (N)  | 240621 | 3782564 | 5  | 145   | 13  | SW | 233   | 13   | 2-110: excavated exposure in altered & brecciated lower plate just below p.s.p.                   |
| 2-110  | Clara District (N)  |        |         | 5? | 85    | 26  | SE | 135   | 20   |                                                                                                   |
| 2-110  | Clara District (N)  |        |         | 5  | 103   | 22  | S  |       |      |                                                                                                   |
| 2-111  | Clara District (N)  | 240717 | 3782538 | 1  | 50    | 12  | SE |       |      | excavated exposure                                                                                |
| 2-112  | Clara District (N)  | 240479 | 3782380 | 1  | 46    | 13  | SE | 211   | 3    | excavated exposure                                                                                |
| 2-114  | Clara District (N)  | 241796 | 3782205 | 1  | 78    | 18  | S  | 215   | 14   |                                                                                                   |
| 2-114  | Clara District (N)  |        |         | 5  | 47    | 40  | SE | 132   | 39   | ≥4 m long trace; right below p.s.p.; R shears suggest normal slip                                 |
| 2-115  | Clara District (N)  | 241631 | 3782216 | 1  | 88.5  | 25  | S  |       |      | excavated exposure; possible ESE-plunging grooves                                                 |
| 2-115  | Clara District (N)  |        |         | 1  | 88    | 21  | S  | 196   | 20   |                                                                                                   |
| 2-115  | Clara District (N)  |        |         | 1  |       |     |    | 113   | 9    |                                                                                                   |
| 2-115  | Clara District (N)  |        |         | 1  |       |     |    | 152   | 19   |                                                                                                   |
| 2-115  | Clara District (N)  |        |         | 5  | 151   | 23  | SW | 317   | 6    | 1-2 m below p.s.p.                                                                                |
| 2-121  | Clara District (N)  | 241841 | 3782520 | 1  | 26    | 14  | SE | 31    | 1    | excavated exposure                                                                                |
| 2-121  | Clara District (N)  |        |         | 1  | 30    | 13  | SE | 198.5 | 4    | grooves are more clear than set trending 31                                                       |
| 2-131  | Clara District (N)  | 242810 | 3783726 | 1  | 55    | 17  | SE | 222   | 4    | subtle slicks                                                                                     |
| 2-131  | Clara District (N)  |        |         | 1  |       |     |    | 130   | 16   | more pronounced grooves than set trending 222; small chatter marks suggest top-NW (reverse)       |
| 2-131  | Clara District (N)  |        |         | 1  |       |     |    | 147   | 17   |                                                                                                   |
| 2-137  | Clara District (N)  | 242859 | 3783817 | 1  | 357   | 14  | E  | 27    | 7    |                                                                                                   |
| 2-137  | Clara District (N)  |        |         | 1  |       |     |    | 22    | 6    | slicks are more clear than set trending 27                                                        |
| 2-137  | Clara District (N)  |        |         | 1  | 29    | 11  | SE |       |      |                                                                                                   |
| 2-141  | Clara District (N)  | 242584 | 3783708 | 1  | 16    | 15  | E  | 53    | 8.5  | apparent S-C fabric in gouge zone immediately below p.s.p. suggests top-NW (reverse)              |
| 2-142  | Clara District (N)  | 242442 | 3783643 | 1  | 332   | 10  | NE | 64    | 10   | subtle slicks                                                                                     |
| 2-142  | Clara District (N)  |        |         | 2* | 345   | 9   | E  | 56.5  | 8    | very clear slicks on throughgoung fault ~40-45 cm above p.s.p.                                    |
| 4-70   | Clara District (N)  | 240869 | 3782470 | 3  | 97    | 10  | S  | 195   | 10   | ~1 m below p.s.p.                                                                                 |

|        |                        |        |         |        |     |     |    |      |      |                                                                                                                                       |
|--------|------------------------|--------|---------|--------|-----|-----|----|------|------|---------------------------------------------------------------------------------------------------------------------------------------|
| 4-70   | Clara District (N)     |        |         | 3      |     |     |    | 225  | 8    | continuous, planar surface; psp dips ~23-25 S                                                                                         |
| 4-72   | Clara District (N)     | 240943 | 3782447 | 1      | 103 | 20  | S  |      |      |                                                                                                                                       |
| 4-73   | Clara District (N)     | 241000 | 3782433 | 1      | 70  | 12  | SE |      |      | excavated exposure                                                                                                                    |
| 4-230  | Clara District (N)     | 241735 | 3783098 | 1      | 2   | 15  | E  |      |      | excavated exposure                                                                                                                    |
| 4-241  | Clara District (N)     | 242086 | 3782827 | 1      | 38  | 23  | SE | 199  | 8    | excavated exposure; fine slicks                                                                                                       |
| 4-241  | Clara District (N)     |        |         | 1      |     |     |    | 204  | 6    | slicks curve from trend of 199 to trend of 205 moving NNE                                                                             |
| 4-241  | Clara District (N)     |        |         | 1      |     |     |    | 196  | 9.5  |                                                                                                                                       |
| 4-241  | Clara District (N)     |        |         | 1      |     |     |    | 178  | 15.5 | slicks trending 178 appear to truncate slicks trending 196                                                                            |
| 4-241  | Clara District (N)     |        |         | 1      |     |     |    | 190  | 11.5 |                                                                                                                                       |
| 4-242  | Clara District (N)     | 242083 | 3782839 | 1      | 32  | 13  | SE | 36   | 1.5  | curvature of one groove from trend of 31 to trend of 36 moving in NE direction                                                        |
| 4-242  | Clara District (N)     |        |         | 1      |     |     |    | 211  | 0.5  |                                                                                                                                       |
| 4-242  | Clara District (N)     |        |         | 1      |     |     |    | 204  | 1.5  |                                                                                                                                       |
| 4-242  | Clara District (N)     |        |         | 1      |     |     |    | 164  | 10   | slicks trending 164 appear to be present within larger grooves trending 36                                                            |
| 4-282  | Clara District (N)     | 242340 | 3782479 | 1      | 261 | 5   | N  |      |      | very subtle NE-trending slicks                                                                                                        |
| 4-287  | Clara District (N)     | 241811 | 3783193 | 1      | 22  | 11  | SE |      |      | approximate orientation                                                                                                               |
| 4-291  | Clara District (N)     | 242360 | 3783209 | 1      | 1   | 10  | E  | 120  | 9    | excavated exposure; oriented sample collected of p.s.p. with SE-plunging slicks                                                       |
| 4-291  | Clara District (N)     |        |         | 1      |     |     |    | 132  | 7.5  | curvature of slicks from trend of 135 to 142 in downdip direction                                                                     |
| 4-291  | Clara District (N)     |        |         | 1      |     |     |    | 142  | 6.5  | chrysocolla veinlets w/ apparent NE-dip in oriented thin section of ultracataclasite suggest top-NE slip                              |
| 4-291  | Clara District (N)     |        |         | 1      |     |     |    | 39   | 6.3  | not as clear as SE-plunging slicks                                                                                                    |
| 4-294  | Clara District (N)     | 242265 | 3783400 | 1      | 359 | 12  | E  |      |      |                                                                                                                                       |
| 4-429  | Clara District (N)     | 243190 | 3783922 | 1      | 25  | 17  | SE |      |      |                                                                                                                                       |
| 4-431  | Clara District (N)     | 243185 | 3783865 | 1      | 10  | 17  | E  |      |      |                                                                                                                                       |
| 4-475  | Clara District (N)     | 239958 | 3781950 | 1      | 71  | 10  | S  |      |      |                                                                                                                                       |
| 6-151  | Clara District (N)     | 241000 | 3782432 | 1      | 49  | 15  | SE | 196  | 12   | same station as 4-73; W-side of excavated exposure                                                                                    |
| 6-153  | Clara District (N)     | 242080 | 3782837 | 1      |     |     |    | 41   | 5    | same as station 4-242                                                                                                                 |
| 6-153  | Clara District (N)     | 242080 | 3782837 | 1      |     |     |    | 96   | 11   | same as station 4-242                                                                                                                 |
| 6-153  | Clara District (N)     | 242080 | 3782837 | 1      |     |     |    | 200  | 3.5  | same as station 4-242                                                                                                                 |
| 6-160  | Clara District (N)     | 241653 | 3783234 | 2 or 3 | 26  | 13  | SE | 172  | 8    | smooth, planar surface ~0.5 m below p.s.p.                                                                                            |
| 6-249  | Clara District (N)     | 242863 | 3783833 | 3      | 25  | 14  | SE | 156  | 10   | planar, throughgoing surface ~1 m (?) below p.s.p.                                                                                    |
| 6-249B | Clara District (N)     | 242877 | 3783833 | 1      | 40  | 19  | SE |      |      |                                                                                                                                       |
|        |                        |        |         |        |     |     |    |      |      |                                                                                                                                       |
| 1-84   | Swansea Wilderness (O) | 239687 | 3788287 | 1      | 303 | 6   | NE | 62   | 5    | this set is present within groove trending 47                                                                                         |
| 1-84   | Swansea Wilderness (O) |        |         | 1      |     |     |    | 47   | 5.5  | overprinting relationships suggest this set is the oldest at 1-84; one large groove curves clockwise in plunge direction (from 40-50) |
| 1-84   | Swansea Wilderness (O) |        |         | 1      |     |     |    | 71   | 5    | cuts across more NE-trending slick set                                                                                                |
| 2-21   | Swansea Wilderness (O) | 239678 | 3788282 | 1      | 332 | 5   | NE | 26   | 4    | 1-84, 2-21, 2-22, 2-23: p.s.p. right along road                                                                                       |
| 2-21   | Swansea Wilderness (O) |        |         | 1      |     |     |    | 30   | 4.5  | some grooves curve from 30 to more ENE trend in downdip (NE) direction                                                                |
| 2-21   | Swansea Wilderness (O) |        |         | 1      |     |     |    | 36   | 4.5  |                                                                                                                                       |
| 2-21   | Swansea Wilderness (O) |        |         | 1      |     |     |    | 60   | 5    |                                                                                                                                       |
| 2-21   | Swansea Wilderness (O) |        |         | 1      |     |     |    | 68   | 5    |                                                                                                                                       |
| 2-22   | Swansea Wilderness (O) | 239745 | 3788392 | 1      | 302 | 5   | NE | 34   | 5    | top-NE slip suggested by apparent R shear                                                                                             |
| 2-22   | Swansea Wilderness (O) |        |         | 1      |     |     |    | 41   | 4    | calcite veinlets w/ apparent NE-dip in oriented thin section of ultracataclasite suggest top-NE slip                                  |
| 2-22   | Swansea Wilderness (O) |        |         | 1      |     |     |    | 27   | 4    |                                                                                                                                       |
| 2-23   | Swansea Wilderness (O) | 239738 | 3788423 | 1      | 337 | 7   | NE | 32   | 5.5  |                                                                                                                                       |
| 2-23   | Swansea Wilderness (O) |        |         | 1      |     |     |    | 42   | 6    |                                                                                                                                       |
| 2-29   | Swansea Wilderness (O) | 239647 | 3788010 | 1      | 25  | 14  | SE | 39   | 4    |                                                                                                                                       |
| 4-121  | Swansea Wilderness (O) | 239952 | 3788322 | 1      | 238 | 9.5 | NW | 51   | 1.5  |                                                                                                                                       |
| 4-123  | Swansea Wilderness (O) | 239704 | 3788721 | 1      | 330 | 5.5 | NE | 40   | 5.5  | strike = 330 ± 12                                                                                                                     |
| 4-123  | Swansea Wilderness (O) |        |         | 1      |     |     |    | 45   | 5.5  |                                                                                                                                       |
| 4-123  | Swansea Wilderness (O) |        |         | 1      |     |     |    | 49   | 5.5  |                                                                                                                                       |
| 4-124  | Swansea Wilderness (O) | 239630 | 3788762 | 1      | 34  | 20  | SE | 34   | 0    |                                                                                                                                       |
| 4-124  | Swansea Wilderness (O) |        |         | 1      |     |     |    | 45   | 4    |                                                                                                                                       |
| 4-124  | Swansea Wilderness (O) |        |         | 1      |     |     |    | 49   | 5    |                                                                                                                                       |
| 4-124  | Swansea Wilderness (O) |        |         | 1      |     |     |    | 53   | 6.5  |                                                                                                                                       |
| 4-124  | Swansea Wilderness (O) |        |         | 1      |     |     |    | 57   | 8.5  |                                                                                                                                       |
| 4-124  | Swansea Wilderness (O) |        |         | 1      |     |     |    | 62   | 10   |                                                                                                                                       |
| 4-126  | Swansea Wilderness (O) | 239714 | 3788846 | 1      | 22  | 7.5 | E  | 47   | 3.5  |                                                                                                                                       |
| 4-126  | Swansea Wilderness (O) |        |         | 1      |     |     |    | 54   | 4    | curvature of slicks from trend of 54 to trend of 58 in NE direction                                                                   |
| 4-126  | Swansea Wilderness (O) |        |         | 1      |     |     |    | 59   | 4.5  |                                                                                                                                       |
| 4-140  | Swansea Wilderness (O) | 239327 | 3788593 | 1      | 312 | 6   | NE | 51.5 | 6    | 5-10 cm (?) below p.s.p.                                                                                                              |

|         |                        |        |         |   |     |      |    |      |      |                                                                                                                              |
|---------|------------------------|--------|---------|---|-----|------|----|------|------|------------------------------------------------------------------------------------------------------------------------------|
| 4-140   | Swansea Wilderness (O) |        |         | 1 |     |      |    | 39   | 5.5  |                                                                                                                              |
| 4-140   | Swansea Wilderness (O) |        |         | 1 |     |      |    | 45   | 6    | one 4 mm long groove curves from trend of 59 to trend of 66 moving in NE direction                                           |
| 4-140   | Swansea Wilderness (O) |        |         | 1 |     |      |    | 85   | 4.5  | slicks trending 85 & 74 are widespread; appear to truncate grooves trending 39 & 54                                          |
| 4-140   | Swansea Wilderness (O) |        |         | 1 |     |      |    | 74   | 5.5  |                                                                                                                              |
| 4-141   | Swansea Wilderness (O) | 239414 | 3788613 | 1 | 5   | 7    | E  | 46   | 4.5  | planar surface ~10 cm below p.s.p.                                                                                           |
| 4-141   | Swansea Wilderness (O) |        |         | 1 |     |      |    | 31   | 2    |                                                                                                                              |
| 4-558   | N Swansea (O)          | 238440 | 3786624 | 1 | 77  | 10   | S  | 194  | 9    | most slicks on surface are very fine (thin)                                                                                  |
| 4-558   | N Swansea (O)          |        |         | 1 |     |      |    | 208  | 8    |                                                                                                                              |
| 4-558   | N Swansea (O)          |        |         | 1 |     |      |    | 216  | 7    |                                                                                                                              |
| 4-558   | N Swansea (O)          |        |         | 1 |     |      |    | 219  | 6.5  | not as well preserved as SSW-trending slicks                                                                                 |
| 4-558   | N Swansea (O)          |        |         | 1 |     |      |    | 102  | 4.5  | slicks trending 102 appear to truncate slicks trending 214                                                                   |
| 4-558   | N Swansea (O)          |        |         | 1 | 60  | 10   | SE | 124  | 8.5  | clear slicks trending 124 truncate subtle set trending ~190?                                                                 |
| 4-558   | N Swansea (O)          |        |         | 1 |     |      |    | 118  | 7    |                                                                                                                              |
| 4-558   | N Swansea (O)          |        |         | 1 |     |      |    | 78   | 0.5  | slicks trending ~78 appear to truncate groove trending ~118                                                                  |
| 4-558   | N Swansea (O)          |        |         | 1 |     |      |    | 238  | 0.5  |                                                                                                                              |
| 4-558   | N Swansea (O)          |        |         | 1 |     |      |    | 92   | 5.5  |                                                                                                                              |
| 4-562   | N Swansea (O)          | 238377 | 3786750 | 1 | 31  | 6    | SE |      |      | small window of p.s.p. within upper plate tuff                                                                               |
| 4-565   | N Swansea (O)          | 238215 | 3786626 | 1 | 12  | 8    | E  |      |      | approximate orientation of p.s.p.                                                                                            |
| 4-565.5 | N Swansea (O)          | 238186 | 3786589 | 1 | 22  | 7    | SE |      |      |                                                                                                                              |
| 4-582   | Swansea Wilderness (O) | 239331 | 3788739 | 1 | 16  | 7    | E  | 34   | 2    |                                                                                                                              |
| 4-582   | Swansea Wilderness (O) |        |         | 1 |     |      |    | 42   | 3    |                                                                                                                              |
| 4-611   | Swansea Wilderness (O) | 239387 | 3788349 | 1 | 8   | 10   | E  | 37   | 5.5  |                                                                                                                              |
| 4-645   | Swansea Wilderness (O) | 240041 | 3788677 | 1 | 35  | 22   | SE | 35   | 0    |                                                                                                                              |
| 4-661   | Swansea Wilderness (O) | 240271 | 3788659 | 1 | 355 | 10   | E  |      |      |                                                                                                                              |
| 4-665   | Swansea Wilderness (O) | 240300 | 3788643 | 1 | 239 | 10   | NW |      |      |                                                                                                                              |
| 4-683   | Swansea Wilderness (O) | 240205 | 3788229 | 1 | 250 | 4    | NW | 44   | 1.5  | strike = 250 ± 40; one groove trending 255 appears to truncate slicks trending 44                                            |
| 4-683   | Swansea Wilderness (O) |        |         | 1 |     |      |    | 26   | 3    | subtle slicks; appear to be overprinted by slicks trending 44                                                                |
| 4-683   | Swansea Wilderness (O) |        |         | 1 |     |      |    | 58   | 1    |                                                                                                                              |
| 4-700   | Swansea Wilderness (O) | 240377 | 3787954 | 1 | 146 | 7    | SW |      |      |                                                                                                                              |
| 4-708   | Swansea Wilderness (O) | 240059 | 3787637 | 1 | 295 | 7    | N  | 51   | 6.5  |                                                                                                                              |
| 4-708   | Swansea Wilderness (O) |        |         | 1 |     |      |    | 47   | 6.5  | one 6 mm long groove curves from trend of 46 to trend of 49 in NE direction                                                  |
| 4-708   | Swansea Wilderness (O) |        |         | 1 |     |      |    | 42   | 6.5  |                                                                                                                              |
| 4-709   | Swansea Wilderness (O) | 240082 | 3787620 | 1 | 315 | 8    | NE |      |      |                                                                                                                              |
| 4-742   | N Swansea (O)          | 238241 | 3786570 | 1 | 235 | 3    | NW |      |      | strike = 235 ± 25                                                                                                            |
| 4-747   | N Swansea (O)          | 238274 | 3786495 | 1 | 265 | 3    | N  | 319  | 2    | slicks on planar cataclasite surface ~2 cm above p.s.p. (parallel to p.s.p.)                                                 |
| 4-747   | N Swansea (O)          |        |         | 1 |     |      |    | 324  | 2.5  | slicks trending 319 curve to trend of 324 moving in NW direction                                                             |
| 4-747   | N Swansea (O)          |        |         | 1 |     |      |    | 44   | 2    | most widespread slick set                                                                                                    |
| 4-747   | N Swansea (O)          |        |         | 1 |     |      |    | 57   | 1.5  |                                                                                                                              |
| 4-747   | N Swansea (O)          |        |         | 1 |     |      |    | 304  | 2    | slicks on thin red-brown coating on p.s.p.                                                                                   |
| 9-36    | Swansea Wilderness (O) | 240667 | 3788683 | 1 | 275 | 12   | N  |      |      | orientation of ultracataclasite ledge                                                                                        |
| 9-144   | Swansea Wilderness (O) | 239853 | 3786689 | 1 | 335 | 5    | NE |      |      | top of ultracataclasite ledge                                                                                                |
| 4-525   | Centennial Wash (P)    | 237353 | 3793814 | 1 | 248 | 15   | NW |      |      | approximate attitude                                                                                                         |
| 4-527   | Centennial Wash (P)    | 238573 | 3794132 | 1 | 253 | 11   | N  |      |      | average attitude of planar surfaces in ultracataclasite <10 cm below p.s.p.                                                  |
| 4-528   | Centennial Wash (P)    | 238494 | 3794053 | 1 | 240 | 12   | NW | 343  | 11.5 | fine slicks on thin black coating on p.s.p.                                                                                  |
| 4-528   | Centennial Wash (P)    |        |         | 1 |     |      |    | 327  | 12   |                                                                                                                              |
| 5-78    | Centennial Wash (P)    | 239445 | 3794405 | 1 | 265 | 10   | N  |      |      | approximate orientation of p.s.p.                                                                                            |
| 5-79    | Centennial Wash (P)    | 239517 | 3794396 | 1 |     |      |    | 55   | 2    | additional possible slick sets trend ~47 & 62                                                                                |
| 5-80    | Centennial Wash (P)    | 239672 | 3794411 | 1 | 252 | 10   | N  |      |      | top of exposed ultracataclasite                                                                                              |
| 5-81    | Centennial Wash (P)    | 239813 | 3794440 | 1 | 240 | 10.5 | NW | 38   | 5    |                                                                                                                              |
| 5-81    | Centennial Wash (P)    |        |         | 1 |     |      |    | 43   | 3.5  |                                                                                                                              |
| 5-81    | Centennial Wash (P)    |        |         | 1 |     |      |    | 57.5 | 3    | slicks trending 57.5 & 48.5 are exposed in isolated areas along p.s.p.                                                       |
| 5-81    | Centennial Wash (P)    |        |         | 1 |     |      |    | 48.5 | 3    |                                                                                                                              |
| 5-81    | Centennial Wash (P)    |        |         | 1 |     |      |    | 331  | 9    | fine (narrow) NW-trending slicks are widespread across p.s.p. here; do not appear to be overprinted by NE-SE-trending slicks |
| 5-81    | Centennial Wash (P)    |        |         | 1 |     |      |    | 327  | 11   |                                                                                                                              |
| 5-81    | Centennial Wash (P)    |        |         | 1 |     |      |    | 321  | 10   |                                                                                                                              |
| 5-82    | Centennial Wash (P)    | 240419 | 3794537 | 1 | 223 | 16   | NW |      |      | approximate attitude                                                                                                         |
| 5-83    | Centennial Wash (P)    | 240471 | 3794785 | 1 | 284 | 24   | N  |      |      |                                                                                                                              |
| 5-84    | Centennial Wash (P)    | 241199 | 3794887 | 1 | 218 | 12   | NW |      |      | approximate attitude                                                                                                         |

|        |                         |        |         |   |     |      |    |       |      |                                                                                                               |
|--------|-------------------------|--------|---------|---|-----|------|----|-------|------|---------------------------------------------------------------------------------------------------------------|
| 5-85   | Centennial Wash (P)     | 241073 | 3794708 | 1 | 232 | 20   | NW |       |      |                                                                                                               |
| 5-87   | Rawhide Pipeline (P)    | 241344 | 3795921 | 1 | 320 | 21   | NE |       |      |                                                                                                               |
| 5-88   | Rawhide Pipeline (P)    | 243652 | 3796912 | 1 | 214 | 11   | NW |       |      | approximate attitude                                                                                          |
| 5-89   | Rawhide Pipeline (P)    | 243108 | 3796319 | 1 | 218 | 9.5  | NW | 224   | 1    |                                                                                                               |
| 5-92   | Rawhide Pipeline (P)    | 242176 | 3795170 | 1 | 285 | 4.5  | N  | 21    | 4    | fine slicks trending 21 & 18 overprint subtle deeper grooved trending 42 (fine slicks visible within groove)  |
| 5-92   | Rawhide Pipeline (P)    |        |         | 1 |     |      |    | 18    | 4    |                                                                                                               |
| 5-92   | Rawhide Pipeline (P)    |        |         | 1 |     |      |    | 42    | 4    |                                                                                                               |
| 5-93   | Rawhide Pipeline (P)    | 242008 | 3795248 | 1 |     |      |    | 23.5  | 2    | apparent R shears suggest top-NNE slip                                                                        |
| 4-529  | W Rankin Ranch (Q)      | 243746 | 3790369 | 1 | 173 | 15   | W  |       |      |                                                                                                               |
| 4-530  | W Rankin Ranch (Q)      | 243846 | 3790139 | 1 | 78  | 6.5  | S  | 216   | 3.5  | additional slicks trend ~190?                                                                                 |
| 4-531  | W Rankin Ranch (Q)      | 244150 | 3789926 | 1 | 25  | 7.5  | SE |       |      |                                                                                                               |
| 4-532  | W Rankin Ranch (Q)      | 243598 | 3789768 | 1 | 350 | 13   | E  |       |      |                                                                                                               |
| 4-533  | W Rankin Ranch (Q)      | 243282 | 3790180 | 1 | 294 | 11   | N  | 19    | 11   |                                                                                                               |
| 4-533  | W Rankin Ranch (Q)      |        |         | 1 |     |      |    | 27    | 11   |                                                                                                               |
| 4-533  | W Rankin Ranch (Q)      |        |         | 1 |     |      |    | 55    | 9.5  |                                                                                                               |
| 4-533  | W Rankin Ranch (Q)      |        |         | 1 |     |      |    | 60    | 9    |                                                                                                               |
| 4-533  | W Rankin Ranch (Q)      |        |         | 1 |     |      |    | 330   | 6    |                                                                                                               |
| 4-534  | W Rankin Ranch (Q)      | 243026 | 3790359 | 1 | 292 | 10.5 | N  | 14    | 10.5 | most prominent slick set at 5-534; one 9 mm long groove curves from trend of 8 to trend of 1 moving N         |
| 4-534  | W Rankin Ranch (Q)      |        |         | 1 |     |      |    | 17.5  | 10.5 |                                                                                                               |
| 4-534  | W Rankin Ranch (Q)      |        |         | 1 |     |      |    | 23    | 10.5 |                                                                                                               |
| 4-534  | W Rankin Ranch (Q)      |        |         | 1 |     |      |    | 33    | 10.5 |                                                                                                               |
| 4-534  | W Rankin Ranch (Q)      |        |         | 1 |     |      |    | 38    | 10   |                                                                                                               |
| 4-534  | W Rankin Ranch (Q)      |        |         | 1 |     |      |    | 42    | 10   | additional slicks trend 62 & 77?                                                                              |
| 4-534  | W Rankin Ranch (Q)      |        |         | 1 | 320 | 13   | NE | 43    | 13   | ~3 m E of 292, 10.5 N attitude; p.s.p. varies from 314, 13.5 NE to 328, 11 NE                                 |
| 4-534  | W Rankin Ranch (Q)      |        |         | 1 |     |      |    | 45    | 13   |                                                                                                               |
| 4-534  | W Rankin Ranch (Q)      |        |         | 1 |     |      |    | 48    | 13   |                                                                                                               |
| 4-534  | W Rankin Ranch (Q)      |        |         | 1 |     |      |    | 12    | 10   | slicks trending 12 appear to be present in groove trending 43                                                 |
| 4-534  | W Rankin Ranch (Q)      |        |         | 1 |     |      |    | 19    | 11.5 | slicks trending 12 curve to trend of 19 moving in NNE direction                                               |
| 4-534  | W Rankin Ranch (Q)      |        |         | 1 |     |      |    | 6     | 9.5  | subtle slicks                                                                                                 |
| 4-535  | W Rankin Ranch (Q)      | 242837 | 3790666 | 1 | 10  | 9    | E  | 28    | 3    |                                                                                                               |
| 4-535  | W Rankin Ranch (Q)      |        |         | 1 |     |      |    | 32.5  | 3.5  |                                                                                                               |
| 4-535  | W Rankin Ranch (Q)      |        |         | 1 |     |      |    | 37.5  | 4    |                                                                                                               |
| 4-536  | W Rankin Ranch (Q)      | 245045 | 3790120 | 1 | 56  | 24   | SE |       |      | crude estimate of detachment orientation                                                                      |
| 4-537  | W Rankin Ranch (Q)      | 245860 | 3789460 | 1 | 172 | 35   | W  |       |      | approximate orientation of detachment                                                                         |
| 4-538  | W Rankin Ranch (Q)      | 243775 | 3790518 | 1 | 228 | 15   | NW |       |      | approximate orientation of detachment                                                                         |
| 5-95   | Rankin Ranch (Q)        | 247188 | 3790235 | 1 | 217 | 16   | NW |       |      | possible faint slicks trending 280                                                                            |
| 3-233  | Lincoln Ranch basin (R) | 253057 | 3783977 | 1 | 172 | 14   | W  |       |      | lunate shear in cataclasite ledge suggests top-SW slip(!)                                                     |
| 3-234  | Lincoln Ranch basin (R) | 253083 | 3783907 | 1 | 155 | 23   | SW | 241   | 23   | nice exposure of detachment cataclasite in A-bomb canyon; subtle slicks                                       |
| 3-234  | Lincoln Ranch basin (R) |        |         | 1 |     |      |    | 234   | 22.5 | clear slicks on ~2x2 cm wide area on p.s.p.                                                                   |
| 3-236  | Lincoln Ranch basin (R) | 254119 | 3783695 | 1 | 280 | 5    | N  |       |      | overhanging surface; possible subtle slicks trending ~295?                                                    |
| 3-237  | Lincoln Ranch basin (R) | 253725 | 3784212 | 1 | 280 | 8    | N  | 25    | 7.8  | one large groove trending 23 has fine slicks within it trending 28-35                                         |
| 3-237  | Lincoln Ranch basin (R) |        |         | 1 |     |      |    | 32    | 7.5  |                                                                                                               |
| 3-237  | Lincoln Ranch basin (R) |        |         | 1 |     |      |    | 44    | 7    | less widespread than slick set trending 25 & 32                                                               |
| 3-238  | Lincoln Ranch basin (R) | 253593 | 3784161 | 1 | 239 | 10   | NW | 25    | 5.5  | top of cataclasite ledge; slicks trending 25 is the more clear ans widespread set                             |
| 3-238  | Lincoln Ranch basin (R) |        |         | 1 |     |      |    | 33.5  | 4    |                                                                                                               |
| 3-238  | Lincoln Ranch basin (R) |        |         | 1 |     |      |    | 40    | 3    |                                                                                                               |
| 3-239  | Lincoln Ranch basin (R) | 257127 | 3783431 | 1 | 240 | 12   | NW | 35    | 5.5  | slicks preserved on thin black coating on top of cataclasite ledge; apparent lunate shear suggests top-SW (!) |
| 3-240  | Lincoln Ranch basin (R) | 256515 | 3784224 | 1 | 155 | 40   | SW |       |      | top of cataclasite ledge(?), attitude modified by Lincoln Ranch fault?                                        |
| 3-241  | Lincoln Ranch basin (R) | 256290 | 3785754 | 1 | 178 | 4    | W  |       |      |                                                                                                               |
| 3-242  | Lincoln Ranch basin (R) | 256511 | 3785820 | 1 | 258 | 10   | N  |       |      | top of cataclasite ledge                                                                                      |
| 3-243  | Lincoln Ranch basin (R) | 256595 | 3785811 | 1 | 248 | 9    | NW | 58.5  | 1.5  | top of cataclasite ledge; slicks on ~1x1 cm white coating                                                     |
| 3-244  | Lincoln Ranch basin (R) | 256590 | 3786068 | 1 | 220 | 11   | NW | 238.5 | 3.5  |                                                                                                               |
| 3-245  | Lincoln Ranch basin (R) | 256586 | 3786055 | 1 | 225 | 9    | NW | 244   | 3    | top of cataclasite ledge                                                                                      |
| 10-162 | Lincoln Ranch basin (R) | 255154 | 3783427 | 1 | 233 | 16.5 | NW |       |      | top of cataclasite ledge                                                                                      |
| 5-71   | S Cleopatra Mine (S)    | 249536 | 3799758 | 1 | 255 | 16   | N  |       |      | orientation of ultracataclasite ledge                                                                         |
| 5-73   | Fisher Camp (S)         | 246942 | 3797397 | 1 | 245 | 10   | NW |       |      | N-dipping listric faults flatten into sharp, overhanging p.s.p.                                               |

|       |                       |        |         |   |     |      |    |      |      |                                                                                                                                                       |
|-------|-----------------------|--------|---------|---|-----|------|----|------|------|-------------------------------------------------------------------------------------------------------------------------------------------------------|
| 5-75  | Fisher Camp (S)       | 246741 | 3797303 | 1 | 240 | 9.5  | NW |      |      | averaged attitude estimate; possible faint SW-trending slicks on some surfaces                                                                        |
| 5-76  | Fisher Camp (S)       | 247262 | 3798625 | 1 | 213 | 19.5 | NW |      |      | approximate orientation of cataclasite ledge                                                                                                          |
| 5-47  | Rawhide Mine (T)      | 254958 | 3798628 | 1 | 358 | 7    | E  |      |      | top of ultracataclasite ledge, possible subtle slicks trending 72 & 60?                                                                               |
| 5-48  | Rawhide Mine (T)      | 254953 | 3798626 | 1 | 342 | 9    | E  | 47   | 8    |                                                                                                                                                       |
| 5-49  | Rawhide Mine (T)      | 254934 | 3798609 | 1 |     |      |    | 26   | 6.5  | next to 5-48 (slick set trending 47 also present)                                                                                                     |
| 5-50  | Rawhide Mine (T)      | 254877 | 3798530 | 1 | 345 | 11   | E  | 38   | 8    | curvature of slick set from trend of 38 to trend of 43 moving in NE direction                                                                         |
| 5-50  | Rawhide Mine (T)      |        |         | 1 |     |      |    | 43   | 8    | Fe-oxide veinlets w/ moderate to steep apparent NE-dip in oriented thin section of ultracataclasite suggest top-NE slip                               |
| 5-51  | Deer Trail Mine (T)   | 255687 | 3797699 | 1 | 298 | 11   | NE |      |      | orientation of top of ultracataclasite ledge                                                                                                          |
| 5-53  | Deer Trail Mine (T)   | 255634 | 3797894 | 1 | 322 | 7    | NE | 37   | 6.5  | near top of ultracataclasite ledge; possible additional slick sets trending 29 & 49                                                                   |
| 5-55  | SE Bonanza Mine (T)   | 256002 | 3795989 | 1 | 152 | 16   | SW |      |      |                                                                                                                                                       |
| 5-56  | Bonanza Mine (T)      | 254560 | 3796989 | 1 | 70  | 17   | SE |      |      | excavated exposure                                                                                                                                    |
| 5-58  | Cactus Queen Mine (T) | 254102 | 3797888 | 1 | 49  | 3.5  | SE |      |      |                                                                                                                                                       |
| 5-59  | Cactus Queen Mine (T) | 254084 | 3797833 | 2 | 50  | 14   | SE | 170  | 9    | polished, planar surface ≤15 cm below p.s.p.                                                                                                          |
| 5-60  | Bonanza Mine (T)      | 254697 | 3796918 | 1 | 29  | 17   | SE |      |      | approximate attitude                                                                                                                                  |
| 5-61  | Bonanza Mine (T)      | 255320 | 3796995 | 1 | 48  | 21   | SE | 65.8 | 6.7  | listric NE-dipping R shear in upper plate indicates top-NE slip                                                                                       |
| 5-61  | Bonanza Mine (T)      |        |         | 1 |     |      |    | 51.7 | 1.4  | slicks at 5-61 are subtle; orientation from rake                                                                                                      |
| 5-62  | Deer Trail Mine (T)   | 255721 | 3797346 | 1 | 22  | 9    | SE | 45   | 3.5  | locally p.s.p. dips more steeply; slicks on thin black coating                                                                                        |
| 5-62  | Deer Trail Mine (T)   |        |         | 1 |     |      |    | 51.5 | 4.5  | slicks on white calcedony                                                                                                                             |
| 5-63  | S Bonanza Mine (T)    | 254910 | 3795787 | 1 | 32  | 18   | SE | 49   | 6    | slicks are groove casts lineations of various scales on p.s.p.                                                                                        |
| 5-64  | S Bonanza Mine (T)    | 254800 | 3795723 | 1 | 351 | 7    | E  | 65   | 6.5  | groove casts lineations; average orientation (trend ranges from ~55-72, mostly ~60-68)                                                                |
| 5-65  | S Bonanza Mine (T)    | 254516 | 3795765 | 1 | 6   | 5    | E  |      |      | approximate attitude                                                                                                                                  |
| 5-66  | W Bonanza Mine (T)    | 253053 | 3797174 | 1 | 350 | 11   | E  |      |      | possible slick set trending ~51?                                                                                                                      |
| 5-67  | W Bonanza Mine (T)    | 253419 | 3797135 | 1 | 20  | 3    | E  | 40   | 1    | NE-trending slicks are relatively clear                                                                                                               |
| 5-67  | W Bonanza Mine (T)    |        |         | 1 |     |      |    | 43   | 1.3  |                                                                                                                                                       |
| 5-67  | W Bonanza Mine (T)    |        |         | 1 |     |      |    | 52   | 1.5  |                                                                                                                                                       |
| 5-67  | W Bonanza Mine (T)    |        |         | 1 |     |      |    | 29   | 0.5  |                                                                                                                                                       |
| 5-67  | W Bonanza Mine (T)    |        |         | 1 |     |      |    | 47.5 | 1.5  |                                                                                                                                                       |
| 5-67  | W Bonanza Mine (T)    |        |         | 1 |     |      |    | 56   | 1.5  |                                                                                                                                                       |
| 5-67  | W Bonanza Mine (T)    |        |         | 1 |     |      |    | 145  | 2.5  | fine SE-trending slicks locally appear to be present within larger NE-trending grooves                                                                |
| 5-67  | W Bonanza Mine (T)    |        |         | 1 |     |      |    | 155  | 2    | apparent R shears suggest SE-trending slicks record top-NW slip                                                                                       |
| 5-68  | Fool's Peak (T)       | 251468 | 3798619 | 1 | 320 | 14   | NE | 36   | 13.5 | highest exposed ultracataclasite; overall ledge appears to dip a little more shallowly than 14°                                                       |
| 5-68  | Fool's Peak (T)       |        |         | 1 |     |      |    | 46   | 14   | highest exposed ultracataclasite                                                                                                                      |
| 5-69  | Fool's Peak (T)       | 251340 | 3798680 | 1 | 302 | 10   | NE | 34.5 | 10   | highest exposed ultracataclasite                                                                                                                      |
| 5-69A | Fool's Peak (T)       |        |         | 2 | 290 | 7    | N  | 55   | 5    | ~15 cm below top of ultracataclasite; ~3 m E of 5-69                                                                                                  |
| 5-40  | E Rawhides (U)        | 258447 | 3795173 | 1 | 265 | 15   | N  | 48   | 9    |                                                                                                                                                       |
| 5-42  | E Rawhides (U)        | 258365 | 3795110 | 1 | 252 | 21   | N  |      |      | top of exposed ultracataclasite                                                                                                                       |
| 5-43  | E Rawhides (U)        | 258246 | 3795103 | 1 | 280 | 16   | N  |      |      | approximate orientation of ultracataclasite                                                                                                           |
| 5-44  | E Rawhides (U)        | 258172 | 3795090 | 1 | 255 | 22   | N  |      |      | top of ultracataclasite                                                                                                                               |
| 5-54  | E Rawhides (U)        | 258777 | 3795283 | 3 | 318 | 6    | NE | 62   | 5.5  | ~1 m below p.s.p.; throughgoing, polished fault parallel to p.s.p.                                                                                    |
| 3-257 | W Alamo Lake (V)      | 260707 | 3792158 | 1 | 314 | 8    | NE | 54   | 7.8  |                                                                                                                                                       |
| 3-257 | W Alamo Lake (V)      |        |         | 1 |     |      |    | 58   | 7.8  |                                                                                                                                                       |
| 3-258 | W Alamo Lake (V)      | 260476 | 3792305 | 1 | 305 | 6    | NE | 22   | 5.7  | excellent ~10 m long exposure of polished p.s.p.                                                                                                      |
| 3-258 | W Alamo Lake (V)      |        |         | 1 |     |      |    | 32   | 6    | slick sets determined for this outcrop are based on grouping dozens of measurements into clear sets                                                   |
| 3-258 | W Alamo Lake (V)      |        |         | 1 |     |      |    | 35   | 6    |                                                                                                                                                       |
| 3-258 | W Alamo Lake (V)      |        |         | 1 |     |      |    | 37   | 6    |                                                                                                                                                       |
| 3-258 | W Alamo Lake (V)      |        |         | 1 |     |      |    | 48   | 6    | slicks locally curve from trend of 48 to trend of 54.5 in NE-direction; this set is truncated by groove trending 63                                   |
| 3-258 | W Alamo Lake (V)      |        |         | 1 |     |      |    | 54   | 5.5  |                                                                                                                                                       |
| 3-258 | W Alamo Lake (V)      |        |         | 1 |     |      |    | 58   | 5.5  |                                                                                                                                                       |
| 3-258 | W Alamo Lake (V)      |        |         | 1 |     |      |    | 63   | 5.5  |                                                                                                                                                       |
| 3-258 | W Alamo Lake (V)      |        |         | 1 |     |      |    | 67   | 5.5  | one ~4 m long groove curves from trend of 67 to trend of 74 in NE-direction                                                                           |
| 3-258 | W Alamo Lake (V)      |        |         | 1 |     |      |    | 73   | 5    |                                                                                                                                                       |
| 3-258 | W Alamo Lake (V)      |        |         | 1 |     |      |    | 77   | 5    | some grooves trending ~77-79 truncate slicks trending 37                                                                                              |
| 3-258 | W Alamo Lake (V)      |        |         | 1 |     |      |    | 82   | 4.5  | locally groove trending 81 curves to trend of 84 in E-direction                                                                                       |
| 3-258 | W Alamo Lake (V)      |        |         | 1 |     |      |    | 87   | 4    | slicks trending 89 & 82 appear to truncate slicks trending ~37                                                                                        |
| 3-258 | W Alamo Lake (V)      |        |         | 1 |     |      |    | 97   | 3    | slicks trending ~83-100 are relatively isolated, deeper grooves                                                                                       |
| 3-259 | W Alamo Lake (V)      | 260207 | 3792751 | 1 | 303 | 8    | NE |      |      | orientation of ultracataclasite ledge; possible slick set trending ~66; S-C fabric in oriented thin section of ultracataclasite indicates top-NE slip |



[illegible]

## Category R slicks

| STATION | AREA (Fig. 2 domain) | UTM_X  | UTM_Y   | SLICK. TREND | PLUNGE |                                                                                                                           |
|---------|----------------------|--------|---------|--------------|--------|---------------------------------------------------------------------------------------------------------------------------|
| 10-23   | Mineral Wash (C)     | 775575 | 3789124 | 323          | 7      | *see Fig. 10 in manuscript for sense of slip in each domain                                                               |
| 10-23   | Mineral Wash (C)     |        |         | 336          | 10     | *almost all category R slicks are approximately down-dip on curvilinear faults in cataclasite <2 m below detachment fault |
| 10-23   | Mineral Wash (C)     |        |         | 313          | 31     |                                                                                                                           |
| 10-23   | Mineral Wash (C)     |        |         | 345          | 14     |                                                                                                                           |
| 10-23   | Mineral Wash (C)     |        |         | 333          | 11     |                                                                                                                           |
| 10-23   | Mineral Wash (C)     |        |         | 45           | 1      |                                                                                                                           |
| 10-23   | Mineral Wash (C)     |        |         | 358          | 7      |                                                                                                                           |
| 10-23   | Mineral Wash (C)     |        |         | 356          | 11     |                                                                                                                           |
| 10-23   | Mineral Wash (C)     |        |         | 38           | 23     |                                                                                                                           |
| 10-23   | Mineral Wash (C)     |        |         | 352          | 2      |                                                                                                                           |
| 10-24   | Mineral Wash (C)     | 775751 | 3789327 | 129          | 33     |                                                                                                                           |
| 10-24   | Mineral Wash (C)     |        |         | 142          | 16     |                                                                                                                           |
| 10-24   | Mineral Wash (C)     |        |         | 132          | 17     |                                                                                                                           |
| 10-24   | Mineral Wash (C)     |        |         | 39           | 6      |                                                                                                                           |
| 10-24   | Mineral Wash (C)     |        |         | 119          | 30     |                                                                                                                           |
| 10-24   | Mineral Wash (C)     |        |         | 128          | 1      |                                                                                                                           |
| 10-24   | Mineral Wash (C)     |        |         | 28           | 20     |                                                                                                                           |
| 3-207   | Squaw Peak (D)       | 227676 | 3784102 | 123          | 27     |                                                                                                                           |
| 4-545   | Planet Wash (F)      | 228632 | 3791436 | 310          | 34     |                                                                                                                           |
| 4-545   | Planet Wash (F)      |        |         | 303          | 15     |                                                                                                                           |
| 4-545   | Planet Wash (F)      |        |         | 355          | 17     |                                                                                                                           |
| 4-547   | Planet Wash (F)      | 226018 | 3793465 | 227          | 6      |                                                                                                                           |
| 4-547   | Planet Wash (F)      |        |         | 233          | 5.5    |                                                                                                                           |
| 4-547   | Planet Wash (F)      |        |         | 207          | 5      |                                                                                                                           |
| 4-549   | Planet Wash (F)      | 225965 | 3793886 | 318          | 24     |                                                                                                                           |
| 4-549   | Planet Wash (F)      |        |         | 322          | 9      |                                                                                                                           |
| 4-549   | Planet Wash (F)      |        |         | 317          | 10     |                                                                                                                           |
| 4-549   | Planet Wash (F)      |        |         | 124          | 7      |                                                                                                                           |
| 4-549   | Planet Wash (F)      |        |         | 117          | 72     |                                                                                                                           |
| 4-549   | Planet Wash (F)      |        |         | 125          | 20     |                                                                                                                           |
| 4-549   | Planet Wash (F)      |        |         | 120          | 35     |                                                                                                                           |
| 4-549   | Planet Wash (F)      |        |         | 118          | 30     |                                                                                                                           |
| 4-549   | Planet Wash (F)      |        |         | 112          | 33     |                                                                                                                           |
| 4-549   | Planet Wash (F)      |        |         | 322          | 22     |                                                                                                                           |
| 4-549   | Planet Wash (F)      |        |         | 116          | 27     |                                                                                                                           |
| 4-549   | Planet Wash (F)      |        |         | 130          | 30     |                                                                                                                           |
| 4-549   | Planet Wash (F)      |        |         | 144          | 35     |                                                                                                                           |
| 4-549   | Planet Wash (F)      |        |         | 96           | 66     |                                                                                                                           |
| 4-549   | Planet Wash (F)      |        |         | 115          | 36     |                                                                                                                           |
| 4-549   | Planet Wash (F)      |        |         | 114          | 59     |                                                                                                                           |
| 4-549   | Planet Wash (F)      |        |         | 132          | 39     |                                                                                                                           |
| 4-549   | Planet Wash (F)      |        |         | 116          | 34     |                                                                                                                           |
| 4-549   | Planet Wash (F)      |        |         | 335          | 9      |                                                                                                                           |
| 6-168   | Copper Penny (G)     | 232484 | 3784135 | 3            | 10     |                                                                                                                           |
| 2-36    | Copper Penny (G)     |        |         | 43           | 14     |                                                                                                                           |
| 2-36    | Copper Penny (G)     |        |         | 35           | 14     |                                                                                                                           |
| 6-169   | Copper Penny (G)     | 233324 | 3784537 | 35           | 5      |                                                                                                                           |
| 6-169   | Copper Penny (G)     |        |         | 36           | 10     |                                                                                                                           |
| 6-169   | Copper Penny (G)     |        |         | 31           | 7      |                                                                                                                           |
| 6-169   | Copper Penny (G)     |        |         | 35           | 10     |                                                                                                                           |
| 6-169   | Copper Penny (G)     |        |         | 21           | 12     |                                                                                                                           |
| 6-169   | Copper Penny (G)     |        |         | 218          | 41     |                                                                                                                           |

|                |                  |                |       |      |
|----------------|------------------|----------------|-------|------|
| 6-169          | Copper Penny (G) |                | 218   | 61   |
| 6-169          | Copper Penny (G) |                | 220   | 66   |
| near 6-169     | Copper Penny (G) | 233324 3784537 | 14    | 25   |
| near 6-169     | Copper Penny (G) |                | 52    | 31   |
| near 6-169     | Copper Penny (G) |                | 10    | 30   |
| near 6-169     | Copper Penny (G) |                | 52    | 39   |
| near 6-169     | Copper Penny (G) |                | 305   | 11   |
| near 6-169     | Copper Penny (G) |                | 130   | 68   |
| near 6-169     | Copper Penny (G) |                | 110.6 | 63.1 |
| near 6-169     | Copper Penny (G) |                | 110   | 71   |
| near 6-169     | Copper Penny (G) |                | 138   | 15   |
| near 6-169     | Copper Penny (G) |                | 43    | 24   |
| near 6-169     | Copper Penny (G) |                | 318   | 50   |
| near 6-169     | Copper Penny (G) |                | 97    | 68.9 |
| near 6-169     | Copper Penny (G) |                | 126   | 57   |
| near 6-169     | Copper Penny (G) |                | 38    | 43   |
| near 6-169     | Copper Penny (G) |                | 135   | 49   |
| near 6-169     | Copper Penny (G) |                | 150   | 67   |
| near 6-169     | Copper Penny (G) |                | 123   | 18   |
| near 6-169     | Copper Penny (G) |                | 126   | 46   |
| near 6-169     | Copper Penny (G) |                | 134   | 70   |
| near 6-169     | Copper Penny (G) |                | 313   | 74   |
| near 6-169     | Copper Penny (G) |                | 293   | 7    |
| near 6-169     | Copper Penny (G) |                | 124   | 80   |
| near 6-169     | Copper Penny (G) |                | 136   | 62   |
| near 6-169     | Copper Penny (G) |                | 119   | 26   |
| near 6-169     | Copper Penny (G) |                | 308   | 14   |
| near 6-169     | Copper Penny (G) |                | 132   | 17   |
| near 6-169     | Copper Penny (G) |                | 313   | 74   |
| near 6-169     | Copper Penny (G) |                | 133   | 80   |
| near 6-169     | Copper Penny (G) |                | 132   | 70   |
| near 6-169     | Copper Penny (G) |                | 305   | 14   |
| near 6-169     | Copper Penny (G) |                | 125   | 85   |
| near 6-169     | Copper Penny (G) |                | 132   | 66   |
| near 6-169     | Copper Penny (G) |                | 124   | 78   |
| near 6-169     | Copper Penny (G) |                | 120   | 82   |
| near 6-169     | Copper Penny (G) |                | 317   | 75   |
| near 6-169     | Copper Penny (G) |                | 118   | 23   |
| near 6-169     | Copper Penny (G) |                | 118   | 85   |
| near 6-169     | Copper Penny (G) |                | 52    | 16   |
| near 6-169     | Copper Penny (G) |                | 324   | 85   |
| near 6-169     | Copper Penny (G) |                | 304   | 82   |
| 3-193 to 3-194 | W Swansea (H)    | 235069 3783534 | 129   | 25   |
| 3-193 to 3-194 | W Swansea (H)    |                | 123   | 14   |
| 3-193 to 3-194 | W Swansea (H)    |                | 122   | 35   |
| 3-193 to 3-194 | W Swansea (H)    |                | 123   | 22   |
| 3-193 to 3-194 | W Swansea (H)    |                | 126   | 15   |
| 3-193 to 3-194 | W Swansea (H)    |                | 123   | 31   |
| 3-193 to 3-194 | W Swansea (H)    |                | 123   | 19   |
| 3-193 to 3-194 | W Swansea (H)    |                | 120   | 43   |
| 3-193 to 3-194 | W Swansea (H)    |                | 119   | 53   |
| 3-193 to 3-194 | W Swansea (H)    |                | 119   | 21   |
| 3-193 to 3-194 | W Swansea (H)    |                | 123   | 27   |

|                |                              |        |         |     |    |
|----------------|------------------------------|--------|---------|-----|----|
| 3-193 to 3-194 | W Swansea (H)                |        |         | 126 | 10 |
| 3-193 to 3-194 | W Swansea (H)                |        |         | 132 | 18 |
| 3-193 to 3-194 | W Swansea (H)                |        |         | 120 | 21 |
| 3-193 to 3-194 | W Swansea (H)                |        |         | 116 | 12 |
| 3-193 to 3-194 | W Swansea (H)                |        |         | 115 | 35 |
| 3-193 to 3-194 | W Swansea (H)                |        |         | 121 | 34 |
| 3-193 to 3-194 | W Swansea (H)                |        |         | 108 | 26 |
| 3-193 to 3-194 | W Swansea (H)                |        |         | 310 | 63 |
| 3-193 to 3-194 | W Swansea (H)                |        |         | 140 | 30 |
| 3-193 to 3-194 | W Swansea (H)                |        |         | 124 | 26 |
| 3-193 to 3-194 | W Swansea (H)                |        |         | 109 | 15 |
| 3-193 to 3-194 | W Swansea (H)                |        |         | 113 | 8  |
| 3-193 to 3-194 | W Swansea (H)                |        |         | 134 | 22 |
| 3-193 to 3-194 | W Swansea (H)                |        |         | 119 | 18 |
| 3-193 to 3-194 | W Swansea (H)                |        |         | 101 | 44 |
| 3-193 to 3-194 | W Swansea (H)                |        |         | 118 | 13 |
| 3-193 to 3-194 | W Swansea (H)                |        |         | 107 | 40 |
| 3-193 to 3-194 | W Swansea (H)                |        |         | 119 | 18 |
| 3-193 to 3-194 | W Swansea (H)                |        |         | 118 | 22 |
| 3-193 to 3-194 | W Swansea (H)                |        |         | 117 | 26 |
| 3-193 to 3-194 | W Swansea (H)                |        |         | 115 | 21 |
| 3-193 to 3-194 | W Swansea (H)                |        |         | 116 | 12 |
| 3-193 to 3-194 | W Swansea (H)                |        |         | 103 | 25 |
| 3-193 to 3-194 | W Swansea (H)                |        |         | 126 | 18 |
| 3-193 to 3-194 | W Swansea (H)                |        |         | 132 | 40 |
| 3-193 to 3-194 | W Swansea (H)                |        |         | 114 | 17 |
| 3-193 to 3-194 | W Swansea (H)                |        |         | 93  | 22 |
| 3-193 to 3-194 | W Swansea (H)                |        |         | 279 | 2  |
| 3-193 to 3-194 | W Swansea (H)                |        |         | 114 | 25 |
| 3-193 to 3-194 | W Swansea (H)                |        |         | 298 | 10 |
| 3-193 to 3-194 | W Swansea (H)                |        |         | 125 | 3  |
| 3-193 to 3-194 | W Swansea (H)                |        |         | 115 | 32 |
| 3-193 to 3-194 | W Swansea (H)                |        |         | 299 | 21 |
| 3-193 to 3-194 | W Swansea (H)                |        |         | 295 | 16 |
| 3-193 to 3-194 | W Swansea (H)                |        |         | 351 | 11 |
| 1-63           | W Swansea (H)                | 235621 | 3783860 | 319 | 25 |
| 1-63           | W Swansea (H)                |        |         | 314 | 14 |
| 1-63           | W Swansea (H)                |        |         | 323 | 13 |
| 1-63           | W Swansea (H)                |        |         | 305 | 18 |
| 1-63           | W Swansea (H)                |        |         | 309 | 33 |
| 1-63           | W Swansea (H)                |        |         | 324 | 25 |
| 1-63           | W Swansea (H)                |        |         | 209 | 64 |
| 371            | W Swansea (H)                | 235604 | 3783847 | 311 | 15 |
| 371            | W Swansea (H)                |        |         | 135 | 34 |
| 371            | W Swansea (H)                |        |         | 132 | 9  |
| 371            | W Swansea (H)                |        |         | 295 | 12 |
| 3-192          | W Swansea (H)                | 234547 | 3782980 | 118 | 48 |
| 3-192          | W Swansea (H)                |        |         | 302 | 34 |
| 3-192          | W Swansea (H)                |        |         | 136 | 30 |
| 3-192          | W Swansea (H)                |        |         | 123 | 15 |
| 3-192          | W Swansea (H)                |        |         | 116 | 20 |
| 3-192          | W Swansea (H)                |        |         | 127 | 39 |
| 10-159         | SW Lincoln Ranch synform (J) | 239785 | 3777964 | 135 | 52 |

|        |                              |        |         |     |    |
|--------|------------------------------|--------|---------|-----|----|
| 10-159 | SW Lincoln Ranch synform (J) |        |         | 305 | 73 |
| 10-159 | SW Lincoln Ranch synform (J) |        |         | 320 | 68 |
| 10-159 | SW Lincoln Ranch synform (J) |        |         | 302 | 58 |
| 10-159 | SW Lincoln Ranch synform (J) |        |         | 105 | 71 |
| 10-159 | SW Lincoln Ranch synform (J) |        |         | 277 | 66 |
| 10-159 | SW Lincoln Ranch synform (J) |        |         | 318 | 38 |
| 10-159 | SW Lincoln Ranch synform (J) |        |         | 309 | 72 |
| 10-159 | SW Lincoln Ranch synform (J) |        |         | 131 | 23 |
| 10-159 | SW Lincoln Ranch synform (J) |        |         | 102 | 72 |
| 10-159 | SW Lincoln Ranch synform (J) |        |         | 323 | 57 |
| 10-159 | SW Lincoln Ranch synform (J) |        |         | 281 | 84 |
| 10-159 | SW Lincoln Ranch synform (J) |        |         | 110 | 1  |
| 10-160 | SW Lincoln Ranch synform (J) | 239879 | 3777944 | 48  | 42 |
| 10-160 | SW Lincoln Ranch synform (J) |        |         | 63  | 30 |
| 10-160 | SW Lincoln Ranch synform (J) |        |         | 61  | 35 |
| 10-160 | SW Lincoln Ranch synform (J) |        |         | 96  | 65 |
| 10-160 | SW Lincoln Ranch synform (J) |        |         | 73  | 71 |
| 10-160 | SW Lincoln Ranch synform (J) |        |         | 57  | 37 |
| 10-160 | SW Lincoln Ranch synform (J) |        |         | 77  | 19 |
| 10-160 | SW Lincoln Ranch synform (J) |        |         | 74  | 15 |
| 6-44   | W Butler Valley (K)          | 244870 | 3770788 | 334 | 35 |
| 6-44   | W Butler Valley (K)          |        |         | 317 | 38 |
| 6-44   | W Butler Valley (K)          |        |         | 329 | 64 |
| 6-44   | W Butler Valley (K)          |        |         | 334 | 37 |
| 6-44   | W Butler Valley (K)          |        |         | 335 | 58 |
| 6-44   | W Butler Valley (K)          |        |         | 315 | 37 |
| 6-44   | W Butler Valley (K)          |        |         | 339 | 28 |
| 6-44   | W Butler Valley (K)          |        |         | 318 | 35 |
| 6-44   | W Butler Valley (K)          |        |         | 315 | 50 |
| 4-160  | Swansea (L)                  | 237690 | 3784059 | 134 | 43 |
| 4-160  | Swansea (L)                  |        |         | 138 | 48 |
| 4-160  | Swansea (L)                  |        |         | 158 | 35 |
| 4-160  | Swansea (L)                  |        |         | 163 | 60 |
| 4-161  | Swansea (L)                  | 237749 | 3784096 | 153 | 55 |
| 4-161  | Swansea (L)                  |        |         | 162 | 51 |
| 4-340  | E Swansea (L)                | 239535 | 3785156 | 148 | 29 |
| 4-340  | E Swansea (L)                |        |         | 127 | 46 |
| 4-340  | E Swansea (L)                |        |         | 125 | 33 |
| 4-340  | E Swansea (L)                |        |         | 312 | 10 |
| 4-340  | E Swansea (L)                |        |         | 124 | 52 |
| 4-340  | E Swansea (L)                |        |         | 113 | 40 |
| 4-340  | E Swansea (L)                |        |         | 116 | 74 |
| 4-340  | E Swansea (L)                |        |         | 102 | 37 |
| 4-340  | E Swansea (L)                |        |         | 98  | 35 |
| 4-340  | E Swansea (L)                |        |         | 141 | 35 |
| 4-340  | E Swansea (L)                |        |         | 68  | 17 |
| 4-340  | E Swansea (L)                |        |         | 56  | 40 |
| 4-340  | E Swansea (L)                |        |         | 125 | 42 |
| 4-340  | E Swansea (L)                |        |         | 128 | 29 |
| 4-340  | E Swansea (L)                |        |         | 140 | 35 |
| 4-340  | E Swansea (L)                |        |         | 20  | 43 |
| 4-340  | E Swansea (L)                |        |         | 138 | 43 |
| 4-340  | E Swansea (L)                |        |         | 107 | 21 |

|       |               |        |         |       |      |
|-------|---------------|--------|---------|-------|------|
| 4-340 | E Swansea (L) |        |         | 122   | 45   |
| 4-340 | E Swansea (L) |        |         | 110   | 14   |
| 4-340 | E Swansea (L) |        |         | 281   | 23   |
| 4-340 | E Swansea (L) |        |         | 117   | 32   |
| 4-340 | E Swansea (L) |        |         | 132   | 50   |
| 4-343 | E Swansea (L) | 239619 | 3785251 | 301   | 11   |
| 4-343 | E Swansea (L) |        |         | 285   | 5    |
| 4-343 | E Swansea (L) |        |         | 114   | 23   |
| 4-345 | E Swansea (L) | 239759 | 3785382 | 332   | 42   |
| 4-345 | E Swansea (L) |        |         | 329   | 1    |
| 4-345 | E Swansea (L) |        |         | 321   | 33   |
| 4-345 | E Swansea (L) |        |         | 112   | 40   |
| 4-345 | E Swansea (L) |        |         | 307   | 35   |
| 4-347 | E Swansea (L) | 239815 | 3785441 | 332   | 22   |
| 4-347 | E Swansea (L) |        |         | 318   | 31   |
| 4-347 | E Swansea (L) |        |         | 181   | 38   |
| 4-347 | E Swansea (L) |        |         | 199   | 9    |
| 4-367 | Swansea (L)   | 236910 | 3783644 | 312   | 40   |
| 4-367 | Swansea (L)   |        |         | 174   | 35   |
| 4-367 | Swansea (L)   |        |         | 183   | 36   |
| 4-368 | Swansea (L)   | 236958 | 3783661 | 145   | 35   |
| 4-368 | Swansea (L)   |        |         | 146   | 48   |
| 4-368 | Swansea (L)   |        |         | 140   | 41   |
| 4-368 | Swansea (L)   |        |         | 313   | 7    |
| 4-368 | Swansea (L)   |        |         | 155   | 23   |
| 4-368 | Swansea (L)   |        |         | 133   | 46   |
| 4-368 | Swansea (L)   |        |         | 128   | 56   |
| 4-368 | Swansea (L)   |        |         | 152   | 43   |
| 4-368 | Swansea (L)   |        |         | 145   | 41   |
| 4-368 | Swansea (L)   |        |         | 296   | 11   |
| 4-368 | Swansea (L)   |        |         | 150   | 26   |
| 4-368 | Swansea (L)   |        |         | 152   | 27   |
| 4-369 | Swansea (L)   | 237141 | 3783740 | 158   | 40   |
| 4-369 | Swansea (L)   |        |         | 182.2 | 81.5 |
| 4-369 | Swansea (L)   |        |         | 131   | 67   |
| 4-369 | Swansea (L)   |        |         | 157   | 55   |
| 4-369 | Swansea (L)   |        |         | 157   | 67   |
| 4-369 | Swansea (L)   |        |         | 140   | 38   |
| 4-369 | Swansea (L)   |        |         | 133   | 64   |
| 4-369 | Swansea (L)   |        |         | 168   | 36   |
| 4-369 | Swansea (L)   |        |         | 134   | 34   |
| 4-369 | Swansea (L)   |        |         | 140   | 8    |
| 4-369 | Swansea (L)   |        |         | 136   | 25   |
| 4-369 | Swansea (L)   |        |         | 157   | 39   |
| 4-369 | Swansea (L)   |        |         | 130   | 34   |
| 4-369 | Swansea (L)   |        |         | 146   | 57   |
| 4-369 | Swansea (L)   |        |         | 312   | 5    |
| 4-369 | Swansea (L)   |        |         | 316   | 10   |
| 4-369 | Swansea (L)   |        |         | 140   | 50   |
| 4-369 | Swansea (L)   |        |         | 133   | 11   |
| 4-370 | Swansea (L)   | 237672 | 3784048 | 312   | 42   |
| 4-370 | Swansea (L)   |        |         | 122   | 43   |
| 4-370 | Swansea (L)   |        |         | 125   | 32   |

|       |                    |        |         |       |      |
|-------|--------------------|--------|---------|-------|------|
| 4-370 | Swansea (L)        |        |         | 304   | 2    |
| 4-370 | Swansea (L)        |        |         | 125   | 10   |
| 4-370 | Swansea (L)        |        |         | 132   | 31   |
| 6-131 | Clara Peak (M)     | 240484 | 3783752 | 315   | 38   |
| 6-131 | Clara Peak (M)     |        |         | 323   | 53   |
| 6-131 | Clara Peak (M)     |        |         | 322   | 27   |
| 6-131 | Clara Peak (M)     |        |         | 132   | 68   |
| 6-131 | Clara Peak (M)     |        |         | 352   | 78   |
| 6-131 | Clara Peak (M)     |        |         | 146   | 51   |
| 6-131 | Clara Peak (M)     |        |         | 189.6 | 61.2 |
| 6-131 | Clara Peak (M)     |        |         | 318   | 2    |
| 6-131 | Clara Peak (M)     |        |         | 324   | 14   |
| 6-131 | Clara Peak (M)     |        |         | 143   | 19   |
| 6-131 | Clara Peak (M)     |        |         | 329   | 5    |
| 6-131 | Clara Peak (M)     |        |         | 323   | 22   |
| 6-131 | Clara Peak (M)     |        |         | 321   | 19   |
| 6-131 | Clara Peak (M)     |        |         | 317   | 45   |
| 6-131 | Clara Peak (M)     |        |         | 138   | 30   |
| 6-131 | Clara Peak (M)     |        |         | 314   | 8    |
| 6-132 | Clara Peak (M)     | 240474 | 3783782 | 342   | 50   |
| 6-132 | Clara Peak (M)     |        |         | 331   | 55   |
| 6-132 | Clara Peak (M)     |        |         | 121   | 34   |
| 6-133 | Clara Peak (M)     | 240476 | 3783815 | 320   | 50   |
| 6-260 | Clara Peak (M)     | 241288 | 3783577 | 118   | 56   |
| 6-260 | Clara Peak (M)     |        |         | 118   | 65   |
| 6-260 | Clara Peak (M)     |        |         | 36    | 16   |
| 6-265 | Clara Peak (M)     | 241290 | 3783743 | 115   | 34   |
| 6-265 | Clara Peak (M)     |        |         | 126   | 43   |
| 6-265 | Clara Peak (M)     |        |         | 51    | 19   |
| 6-265 | Clara Peak (M)     |        |         | 299   | 9    |
| 6-265 | Clara Peak (M)     |        |         | 121   | 24   |
| 6-265 | Clara Peak (M)     |        |         | 124   | 28   |
| 6-265 | Clara Peak (M)     |        |         | 126   | 64   |
| 6-265 | Clara Peak (M)     |        |         | 100   | 38   |
| 6-265 | Clara Peak (M)     |        |         | 127   | 13   |
| 6-265 | Clara Peak (M)     |        |         | 117   | 50   |
| 6-266 | Clara Peak (M)     | 241286 | 3783785 | 119   | 33   |
| 6-266 | Clara Peak (M)     |        |         | 118   | 36   |
| 6-266 | Clara Peak (M)     |        |         | 120   | 38   |
| 6-266 | Clara Peak (M)     | 241286 | 3783785 | 111   | 5    |
| 6-148 | Clara District (N) | 241791 | 3782208 | 112   | 46   |
| 6-148 | Clara District (N) |        |         | 115   | 40   |
| 6-148 | Clara District (N) |        |         | 108   | 55   |
| 6-148 | Clara District (N) |        |         | 116   | 67   |
| 6-148 | Clara District (N) |        |         | 132   | 40   |
| 6-148 | Clara District (N) |        |         | 120   | 37   |
| 6-148 | Clara District (N) |        |         | 332   | 35   |
| 6-148 | Clara District (N) |        |         | 317   | 25   |
| 6-148 | Clara District (N) |        |         | 314   | 47   |
| 6-148 | Clara District (N) |        |         | 346   | 30   |
| 6-148 | Clara District (N) |        |         | 320   | 43   |
| 6-148 | Clara District (N) |        |         | 126   | 46   |
| 6-149 | Clara District (N) | 241418 | 3782312 | 17    | 66   |

|        |                    |        |         |       |      |
|--------|--------------------|--------|---------|-------|------|
| 6-149  | Clara District (N) |        |         | 205   | 12   |
| 6-149  | Clara District (N) |        |         | 357   | 70   |
| 6-149  | Clara District (N) |        |         | 24    | 45   |
| 6-150  | Clara District (N) | 240940 | 3782434 | 171   | 22   |
| 6-150  | Clara District (N) |        |         | 46    | 67   |
| 6-151  | Clara District (N) | 241000 | 3782432 | 346   | 40   |
| 6-152  | Clara District (N) | 241793 | 3782537 | 43    | 66   |
| 6-152  | Clara District (N) |        |         | 12    | 64   |
| 6-152  | Clara District (N) |        |         | 220   | 5    |
| 6-152  | Clara District (N) |        |         | 5     | 30   |
| 6-153  | Clara District (N) | 242080 | 3782837 | 109   | 20   |
| 6-153  | Clara District (N) |        |         | 200   | 20   |
| 6-153  | Clara District (N) |        |         | 40    | 17   |
| 6-153  | Clara District (N) |        |         | 43    | 30   |
| 6-153  | Clara District (N) |        |         | 36    | 31   |
| 6-153  | Clara District (N) |        |         | 147   | 23   |
| 6-153  | Clara District (N) |        |         | 131   | 20   |
| 6-154  | Clara District (N) | 242141 | 3782775 | 6     | 11   |
| 6-154  | Clara District (N) |        |         | 294   | 6    |
| 6-154  | Clara District (N) |        |         | 132   | 12   |
| 6-154  | Clara District (N) |        |         | 323   | 30   |
| 6-154  | Clara District (N) |        |         | 112   | 37   |
| 6-154  | Clara District (N) |        |         | 124   | 28   |
| 6-154  | Clara District (N) |        |         | 121   | 43   |
| 6-154  | Clara District (N) |        |         | 137   | 13   |
| 6-154  | Clara District (N) |        |         | 112   | 17   |
| 6-154  | Clara District (N) |        |         | 134   | 33   |
| 6-154  | Clara District (N) |        |         | 119   | 5    |
| 6-154  | Clara District (N) |        |         | 129   | 33   |
| 6-154  | Clara District (N) |        |         | 130   | 62   |
| 6-245  | Clara District (N) | 240072 | 3782029 | 186   | 17   |
| 6-245  | Clara District (N) |        |         | 162   | 23   |
| 6-245  | Clara District (N) |        |         | 169   | 27   |
| 6-245  | Clara District (N) |        |         | 179   | 26   |
| 6-245  | Clara District (N) |        |         | 232   | 53   |
| 6-245  | Clara District (N) |        |         | 147   | 19   |
| 6-245  | Clara District (N) |        |         | 171   | 29   |
| 6-245B | Clara District (N) | 240049 | 3782048 | 45    | 20   |
| 6-245B | Clara District (N) |        |         | 192   | 2    |
| 6-246  | Clara District (N) | 243245 | 3784088 | 189   | 12   |
| 6-246  | Clara District (N) |        |         | 176   | 6    |
| 6-246  | Clara District (N) |        |         | 171   | 12   |
| 6-246  | Clara District (N) |        |         | 128   | 30   |
| 6-246  | Clara District (N) |        |         | 158   | 30   |
| 6-246  | Clara District (N) |        |         | 128   | 23   |
| 6-246  | Clara District (N) |        |         | 302   | 55   |
| 6-247  | Clara District (N) | 243185 | 3783868 | 133   | 23   |
| 6-249B | Clara District (N) | 242877 | 3783833 | 145   | 5    |
| 6-250  | Clara District (N) | 242441 | 3783647 | 170   | 8    |
| 6-250  | Clara District (N) |        |         | 145   | 30   |
| 3-291  | Clara District (N) |        |         | 137   | 26   |
| 3-291  | Clara District (N) |        |         | 124.4 | 69.6 |
| 3-291  | Clara District (N) |        |         | 105   | 44   |



|                |                        |        |         |     |      |
|----------------|------------------------|--------|---------|-----|------|
| 9-87           | Swansea Wilderness (O) | 239703 | 3787973 | 294 | 66   |
| 9-87           | Swansea Wilderness (O) |        |         | 311 | 52   |
| 9-87           | Swansea Wilderness (O) |        |         | 116 | 52   |
| 9-87           | Swansea Wilderness (O) |        |         | 311 | 51   |
| 9-87           | Swansea Wilderness (O) |        |         | 312 | 63   |
| 9-87           | Swansea Wilderness (O) |        |         | 325 | 43   |
| 9-87           | Swansea Wilderness (O) |        |         | 312 | 54   |
| 9-87           | Swansea Wilderness (O) |        |         | 132 | 37   |
| 9-87           | Swansea Wilderness (O) |        |         | 120 | 42   |
| 9-87           | Swansea Wilderness (O) |        |         | 314 | 60   |
| near 1-84/2-21 | Swansea Wilderness (O) | 239687 | 3788287 | 122 | 28   |
| near 1-84      | Swansea Wilderness (O) |        |         | 308 | 34   |
| near 1-84      | Swansea Wilderness (O) |        |         | 315 | 13   |
| near 1-84      | Swansea Wilderness (O) |        |         | 112 | 10   |
| near 1-84      | Swansea Wilderness (O) |        |         | 134 | 20   |
| near 1-84      | Swansea Wilderness (O) |        |         | 135 | 21   |
| near 1-84      | Swansea Wilderness (O) |        |         | 132 | 24   |
| near 1-84      | Swansea Wilderness (O) |        |         | 287 | 76   |
| near 1-84      | Swansea Wilderness (O) |        |         | 325 | 35   |
| near 1-84      | Swansea Wilderness (O) |        |         | 326 | 46   |
| 4-526          | Centennial Wash (P)    | 237323 | 3793827 | 143 | 27   |
| 4-526          | Centennial Wash (P)    |        |         | 322 | 14   |
| 4-526          | Centennial Wash (P)    |        |         | 135 | 10   |
| 4-526          | Centennial Wash (P)    |        |         | 138 | 15   |
| 4-526          | Centennial Wash (P)    |        |         | 148 | 60   |
| 4-526          | Centennial Wash (P)    |        |         | 326 | 18   |
| 5-77           | Centennial Wash (P)    | 239405 | 3794410 | 105 | 35   |
| 5-77           | Centennial Wash (P)    |        |         | 306 | 1    |
| 5-77           | Centennial Wash (P)    |        |         | 122 | 1    |
| 5-77           | Centennial Wash (P)    |        |         | 303 | 3    |
| 5-78           | Centennial Wash (P)    | 239445 | 3794405 | 35  | 1    |
| 5-78           | Centennial Wash (P)    |        |         | 296 | 5    |
| 5-78           | Centennial Wash (P)    |        |         | 310 | 41   |
| 5-78           | Centennial Wash (P)    |        |         | 304 | 30   |
| 5-78           | Centennial Wash (P)    |        |         | 301 | 45   |
| 5-78           | Centennial Wash (P)    |        |         | 305 | 40   |
| 5-78           | Centennial Wash (P)    |        |         | 313 | 50   |
| 5-78           | Centennial Wash (P)    | 239517 | 3794396 | 97  | 36   |
| 5-80           | Centennial Wash (P)    | 239672 | 3794411 | 44  | 42   |
| 5-80           | Centennial Wash (P)    |        |         | 220 | 30   |
| 5-81           | Centennial Wash (P)    | 239813 | 3794440 | 310 | 19   |
| 5-81           | Centennial Wash (P)    |        |         | 131 | 3    |
| 5-81           | Centennial Wash (P)    |        |         | 335 | 54   |
| 5-81           | Centennial Wash (P)    |        |         | 330 | 33   |
| 5-81           | Centennial Wash (P)    |        |         | 335 | 56   |
| 5-81           | Centennial Wash (P)    |        |         | 324 | 28   |
| 5-81           | Centennial Wash (P)    |        |         | 133 | 45   |
| 5-81           | Centennial Wash (P)    |        |         | 329 | 24   |
| 5-81           | Centennial Wash (P)    |        |         | 329 | 9    |
| 5-84           | Centennial Wash (P)    | 241199 | 3794887 | 324 | 15   |
| 5-84           | Centennial Wash (P)    |        |         | 311 | 23.5 |
| 5-84           | Centennial Wash (P)    |        |         | 328 | 14.5 |
| 5-84           | Centennial Wash (P)    |        |         | 324 | 16   |

|        |                         |        |         |       |      |
|--------|-------------------------|--------|---------|-------|------|
| 5-84   | Centennial Wash (P)     |        |         | 278   | 32   |
| 5-84   | Centennial Wash (P)     |        |         | 28.8  | 81.5 |
| 5-85   | Centennial Wash (P)     | 241073 | 3794708 | 329   | 15.5 |
| 5-85   | Centennial Wash (P)     |        |         | 31    | 3    |
| 5-86   | Centennial Wash (P)     | 241152 | 3794591 | 74    | 37   |
| 5-86   | Centennial Wash (P)     |        |         | 72    | 32   |
| 5-90   | Rawhide Pipeline (P)    | 242479 | 3795139 | 318   | 2    |
| 5-90   | Rawhide Pipeline (P)    |        |         | 324   | 16   |
| 5-90   | Rawhide Pipeline (P)    |        |         | 114   | 32   |
| 5-90   | Rawhide Pipeline (P)    |        |         | 47    | 24   |
| 5-91   | Rawhide Pipeline (P)    | 242300 | 3795095 | 143   | 52   |
| 5-91   | Rawhide Pipeline (P)    |        |         | 152   | 43   |
| 5-91   | Rawhide Pipeline (P)    |        |         | 131   | 42   |
| 5-91   | Rawhide Pipeline (P)    |        |         | 123   | 38   |
| 5-91   | Rawhide Pipeline (P)    |        |         | 337   | 70   |
| 5-91   | Rawhide Pipeline (P)    |        |         | 128   | 38   |
| 5-91   | Rawhide Pipeline (P)    |        |         | 110   | 43   |
| 5-91   | Rawhide Pipeline (P)    |        |         | 320   | 53   |
| 5-93   | Rawhide Pipeline (P)    | 242008 | 3795248 | 171   | 11   |
| 4-532  | W Rankin Ranch (Q)      | 243598 | 3789768 | 328   | 6    |
| 3-235  | Lincoln Ranch basin (R) | 255157 | 3783435 | 324   | 29   |
| 10-162 | Lincoln Ranch basin (R) | 255154 | 3783427 | 308   | 11   |
| 10-162 | Lincoln Ranch basin (R) |        |         | 303   | 83   |
| 10-162 | Lincoln Ranch basin (R) |        |         | 322   | 60   |
| 10-162 | Lincoln Ranch basin (R) |        |         | 286   | 18   |
| 10-162 | Lincoln Ranch basin (R) |        |         | 253.6 | 82   |
| 10-162 | Lincoln Ranch basin (R) |        |         | 309   | 83   |
| 10-162 | Lincoln Ranch basin (R) |        |         | 130   | 42   |
| 10-162 | Lincoln Ranch basin (R) |        |         | 124   | 49   |
| 10-162 | Lincoln Ranch basin (R) |        |         | 318   | 73   |
| 10-162 | Lincoln Ranch basin (R) |        |         | 308   | 69   |
| 10-162 | Lincoln Ranch basin (R) |        |         | 127   | 45   |
| 10-162 | Lincoln Ranch basin (R) |        |         | 312   | 45   |
| 10-162 | Lincoln Ranch basin (R) |        |         | 130   | 51   |
| 10-162 | Lincoln Ranch basin (R) |        |         | 136   | 53   |
| 10-162 | Lincoln Ranch basin (R) |        |         | 125   | 73   |
| 10-162 | Lincoln Ranch basin (R) |        |         | 338   | 57   |
| 10-162 | Lincoln Ranch basin (R) |        |         | 125   | 55   |
| 10-162 | Lincoln Ranch basin (R) |        |         | 124   | 36   |
| 10-162 | Lincoln Ranch basin (R) |        |         | 128   | 61   |
| 10-162 | Lincoln Ranch basin (R) |        |         | 329   | 47   |
| 10-162 | Lincoln Ranch basin (R) |        |         | 129   | 47   |
| 5-52   | Deer Trail Mine (T)     | 255638 | 3797848 | 50    | 3    |
| 5-41   | E Rawhides (U)          | 258400 | 3795128 | 312   | 3    |
| 5-41   | E Rawhides (U)          |        |         | 142   | 25   |
| 5-41   | E Rawhides (U)          |        |         | 129   | 25   |
| 5-41   | E Rawhides (U)          |        |         | 136   | 24   |
| 5-41   | E Rawhides (U)          |        |         | 139   | 7    |
| 5-41   | E Rawhides (U)          |        |         | 344   | 20   |
| 5-41   | E Rawhides (U)          |        |         | 325   | 16   |
| 5-41   | E Rawhides (U)          |        |         | 315   | 56   |
| 5-41   | E Rawhides (U)          |        |         | 138   | 15   |
| 5-41   | E Rawhides (U)          |        |         | 134   | 50   |

|      |                |        |         |     |    |
|------|----------------|--------|---------|-----|----|
| 5-41 | E Rawhides (U) |        |         | 131 | 5  |
| 5-41 | E Rawhides (U) |        |         | 128 | 55 |
| 5-44 | E Rawhides (U) | 258172 | 3795090 | 318 | 22 |
| 5-44 | E Rawhides (U) |        |         | 144 | 61 |
| 5-44 | E Rawhides (U) |        |         | 152 | 41 |
| 5-44 | E Rawhides (U) |        |         | 153 | 55 |
| 6-1  | Burnt Well (X) | 274032 | 3774561 | 310 | 13 |
| 6-1  | Burnt Well (X) |        |         | 292 | 23 |
| 6-1  | Burnt Well (X) |        |         | 301 | 11 |
| 6-1  | Burnt Well (X) |        |         | 312 | 12 |
| 6-5  | Burnt Well (X) | 274508 | 3774879 | 322 | 32 |
| 6-5  | Burnt Well (X) |        |         | 353 | 11 |
| 6-5  | Burnt Well (X) |        |         | 326 | 47 |
| 6-5  | Burnt Well (X) |        |         | 334 | 15 |
| 6-5  | Burnt Well (X) |        |         | 322 | 10 |
| 6-5  | Burnt Well (X) |        |         | 318 | 26 |
| 6-5  | Burnt Well (X) |        |         | 323 | 9  |
| 6-6  | Burnt Well (X) | 274474 | 3774862 | 329 | 41 |
| 6-6  | Burnt Well (X) |        |         | 350 | 23 |

---

All these data were collected from the Buckskin-Rawhide detachment fault between 2007 & 2012 by J.Singleton.

- \*Category rating** (column E on detachment data worksheet)
- 1** = principal slip plane (p.s.p.) or subparallel slip surface  $\leq 10$  cm from p.s.p. (only where noted in comments); includes slicks at the top of lower plate ultracataclasite ledges; surfaces are planar or slightly curvilinear
  - 2** = slip surface 10-50 cm from p.s.p.; subparallel to p.s.p. ( $\leq 15^\circ$  discordance); planar to curvilinear
  - 3** = slip surface 50-100 cm from p.s.p.; subparallel to p.s.p. ( $\leq 15^\circ$  discordance)
  - 4** = slip surface 1-2 m from p.s.p.; subparallel to p.s.p. ( $\leq 15^\circ$  discordance)
  - 5** = subsidiary slip surface  $< 2$  m from p.s.p. but  $> 15^\circ$  discordant to p.s.p.; continuous (trace  $> 0.5$  m)
  - R** = Riedel shears or small-scale slip surfaces  $< 2$  m from p.s.p.; curvilinear and discontinuous surfaces (trace typically  $< 0.5$  m), slip inferred to be cm- to mm-scale

UTM coordinates given are based on North America Datum (NAD) 1927; zone 11 N (domains A-C) or zone 12 N (all other domains)
